# Supplementary material for: On the cost of academic methodologies
Source: Royal Society of Chemistry journal article supplement (doi:10.1039/c9qo00200f), 2019-01-01
Supplement: c9qo00200f1.pdf [file c9qo00200f1.pdf]

## Supporting Information

### On the Cost of Academic Methodologies

Olivier Berger, Karen R. Winters, Axel Sabourin, Sergei V. Dzyuba,\* and Jean-Luc Montchamp\*

#### Table of Contents:

|                                                                            |              |
|----------------------------------------------------------------------------|--------------|
| Definitions & Formulas.....                                                | Page 2       |
| Note about Stereoselectivity.....                                          | Page 3       |
| Detailed Calculations of CAM for Scheme 1.....                             | Page 4       |
| Table S1: 2009 Periodic Table Cost of Transition Metal Chlorides.....      | Page 5       |
| Table S2: 2018 Periodic Table Cost of Transition Metal Chlorides.....      | Page 5       |
| Table S3: 2018 Periodic Table Cost of Metal Chlorides (Complete).....      | Page 6       |
| Table S4: Cost of Common Phosphorus Compounds in 2009, 2012, and 2018..... | Page 7       |
| Table S5: Cost of Common Catalysts and Precursors in 2009 and 2018.....    | Page 8       |
| Table S6: 2018 Prices in US Dollars of Common Chemicals.....               | Pages 9 - 37 |

## Definitions & Formulas:

NOT INCLUDED in the calculations:

- cost of standard reagents ( $\text{Et}_3\text{N}$ ,  $i\text{-Pr}_2\text{NEt}$ ,  $\text{NaOH}$ ,  $\text{KOH}$ ,  $\text{HCl}$ ,  $\text{AcOH}$ , etc.) and solvents. In general, chemicals costing less than 5 \$/mol are not considered because the overall contribution to CAM is negligible.
- costs of isolation and purification of the product.
- material hazards and associated additional shipping costs.
- reaction times, activation and heating methods, etc.
- reaction scale. Although scalability of the chemical methodologies is of the utmost importance for all practical considerations, this information may not be routinely provided in literature accounts.

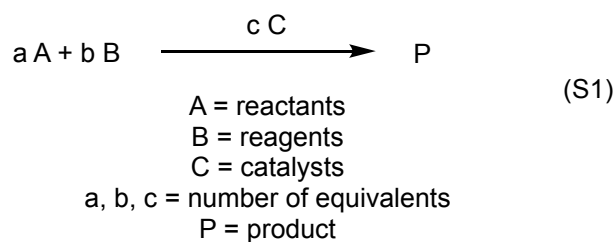

$$\text{CAM} = \frac{\Sigma (bB + cC) (\$/\text{mol})}{1 \text{ or yield}} \quad (\text{S2})$$

$$\text{CAM}^* = \frac{\Sigma (aA + bB + cC) (\$/\text{mol})}{\text{yield}} \quad (\text{S3})$$

$$\text{AMW} = \Sigma (bB + cC) (\text{g}/\text{mol}) \quad (\text{S4})$$

$$\text{AMW}^* = \Sigma (aA + bB + cC) (\text{g}/\text{mol}) \quad (\text{S5})$$

We note that these calculations are very easy to accomplish. Whereas Table S6 certainly may be used to calculate CAM and AMW, the information could be gathered via vendors' websites within minutes.

### Note about stereoselective methodologies (ee's and de's):

The issue of accounting for *ee* (or *de*) of the product in CAM calculations depends on the specific approaches (if any) that would be used to increase the *ee* % after the reaction. In a number of cases, the differences might not be sufficiently large, and thus could be ignored. In general, any *ee* values above 95 % could be treated as equal.

In cases where significantly different *ee*-values are obtained, the cost associated with approaches/reagents/methods to increase *ee*-values should be considered.

For example:

- a) it is known that simple crystallization might increase *ee* (for a review, see: Y. Wang and A. M. Chen, *Org. Process Res. Dev.*, 2008, **12**, 282–290); and in this instance the cost of solvent can be disregarded, and hence contribution of the recrystallization step(s) to overall CAM would be zero. As an example, see Scheme 7 in the manuscript.
- b) if resolving agents are used during the recrystallization step(s) (for some reviews, see: R. Siedlecka, *Tetrahedron*, 2013, **69**, 6331–6363; and E. Vedejs and M. Jure, *Angew. Chem. Int. Ed.*, 2005, **44**, 3974–4001), the costs of those agents should be included in CAM calculations, and the overall yield should be considered for CAM.
- c) if chromatographic techniques are used to get to a particular *ee*, specifics must be indicated and it would be up to the researcher to decide on which route to take (i.e., to decide how the cost of reagents, catalysts could be related to the cost of purification); the cost of chromatographic purification is outside of the scope of this review.

A detailed calculation of CAM for Scheme 1 is shown in Scheme S1 for two different olefinations as functional-group interconversion.

Since the exact structure of the starting material and product are unspecified, CAM is used (Equation S2 above).

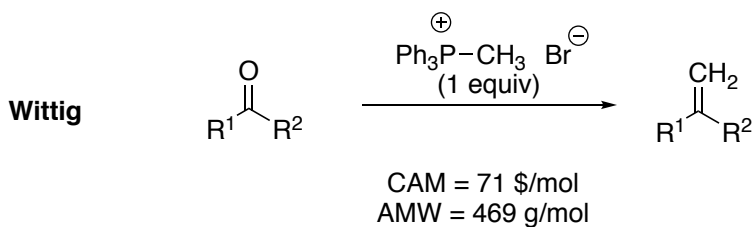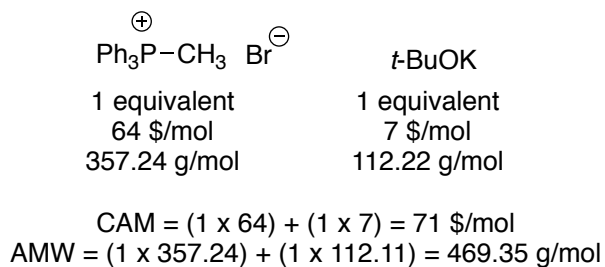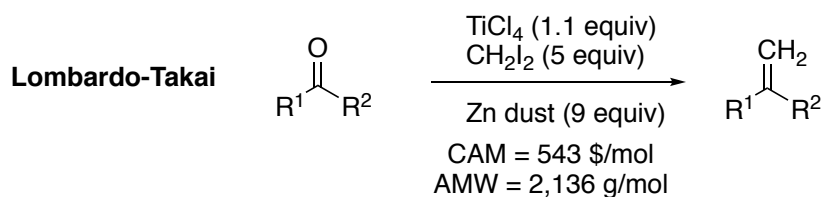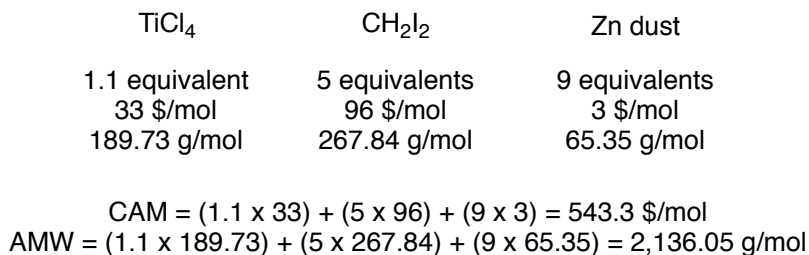

**Scheme S1.** Detailed calculations for the comparison of two olefination methods

**Table S1. 2009 Periodic Table – The Cost of Transition Metal Chlorides**

|                      |           |           |           |              |              |              |              |              |           |
|----------------------|-----------|-----------|-----------|--------------|--------------|--------------|--------------|--------------|-----------|
| Sc<br>14,285         | Ti<br>13  | V<br>520  | Cr<br>120 | Mn<br>8      | Fe<br>2      | Co<br>95     | Ni<br>48     | Cu<br>8      | Zn<br>18  |
| Y<br>510             | Zr<br>60  | Nb<br>110 | Mo<br>141 | Tc           | Ru<br>2,765  | Rh<br>42,360 | Pd<br>4,910  | Ag<br>285    | Cd<br>110 |
| La<br>520-<br>13,490 | Hf<br>350 | Ta<br>860 | W<br>465  | Re<br>35,185 | Os<br>29,540 | Ir<br>16,005 | Pt<br>21,150 | Au<br>21,720 | Hg        |

|                   |                                |                           |                                   |                                    |
|-------------------|--------------------------------|---------------------------|-----------------------------------|------------------------------------|
| Cheap<br>< \$ 100 | Moderately Cheap<br>\$ 100-300 | Expensive<br>\$ 300-1,000 | Very Expensive<br>\$ 1,000-10,000 | Extremely Expensive<br>> \$ 10,000 |
|-------------------|--------------------------------|---------------------------|-----------------------------------|------------------------------------|

[a] This table was compiled in 2009 using G prices for the most available chloride ( $\text{ECl}_n$ ). The number below the element's symbol indicates the cost (in US dollar) per mole of  $\text{ECl}_n$  in its most available oxidation state.

**Table S2. 2018 Periodic Table – The Cost of Transition Metal Chlorides**

|                      |           |             |           |              |              |              |              |              |           |
|----------------------|-----------|-------------|-----------|--------------|--------------|--------------|--------------|--------------|-----------|
| Sc<br>19,970         | Ti<br>33  | V<br>245    | Cr<br>130 | Mn<br>3      | Fe<br>1      | Co<br>71     | Ni<br>70     | Cu<br>5      | Zn<br>5   |
| Y<br>705             | Zr<br>86  | Nb<br>210   | Mo<br>375 | Tc           | Ru<br>4,480  | Rh<br>39,300 | Pd<br>4,470  | Ag<br>250    | Cd<br>105 |
| La<br>700-<br>17,000 | Hf<br>595 | Ta<br>1,025 | W<br>610  | Re<br>33,590 | Os<br>19,070 | Ir<br>19,590 | Pt<br>13,780 | Au<br>26,810 | Hg<br>65  |

|                             |                          |                          |                                  |                                   |
|-----------------------------|--------------------------|--------------------------|----------------------------------|-----------------------------------|
| Very Inexpensive<br>< \$100 | Inexpensive<br>\$100-300 | Expensive<br>\$300-1,000 | Very Expensive<br>\$1,000-10,000 | Extremely Expensive<br>> \$10,000 |
|-----------------------------|--------------------------|--------------------------|----------------------------------|-----------------------------------|

[a] This table was compiled using the least expensive major US supplier of each chloride ( $\text{ECl}_n$ ). The number below the element's symbol indicates the cost (in US dollar) per mole of  $\text{ECl}_n$  in its most available oxidation state. See Supporting Information for details.

**The differences between Tables S1 and S2:**

In 2018,  $\text{VCl}_3$  is 245 \$/mol (dark green), but was yellow in 2009

In 2018,  $\text{MoCl}_5$  is 375 \$/mol (yellow), but was dark green in 2009

In 2018,  $\text{TaCl}_5$  is 1,025 \$/mol (orange), but was yellow in 2009



**Table S4.** Molar Cost of Common Phosphorus Compounds in 2009, 2012, and 2018

| Compound                                           | 2018<br>cost (\$/mol) <sup>[a]</sup> | 2012<br>cost (\$/mol) <sup>[b]</sup> | 2009<br>cost (\$/mol) <sup>[c]</sup> |
|----------------------------------------------------|--------------------------------------|--------------------------------------|--------------------------------------|
| PCl <sub>3</sub>                                   | 17                                   | 13.4                                 | 10                                   |
| PCl <sub>5</sub>                                   | 13                                   | 14.8                                 | 8                                    |
| H <sub>3</sub> PO <sub>3</sub>                     | 5                                    | 5.5                                  | -                                    |
| H <sub>3</sub> PO <sub>2</sub>                     | 5                                    | 7.6                                  | 6                                    |
| NaH <sub>2</sub> PO <sub>2</sub> •H <sub>2</sub> O | 7                                    | 7.6                                  | 8                                    |
| NH <sub>4</sub> H <sub>2</sub> PO <sub>2</sub>     | 14                                   | 8.8                                  | -                                    |
| P(OMe) <sub>3</sub>                                | 8                                    | 8.5                                  | -                                    |
| P(OEt) <sub>3</sub>                                | 6                                    | 5                                    | -                                    |
| (MeO) <sub>2</sub> P(O)H                           | 8                                    | 10.6                                 | -                                    |
| (EtO) <sub>2</sub> P(O)H                           | 12                                   | 10.5                                 | -                                    |

[a] This table was compiled from the least expensive major supplier for each compound. [b] Commercial prices from A, as of June 2012 using the most advantageous quantity. [c] Commercial prices from G, as of February 2009.

**Table S5.** Cost of Common Catalysts and Catalyst Precursors in 2009 and 2018

| Compound                                              | 2018<br>cost (\$/mol) <sup>[a]</sup> | 2018<br>cost (\$/mol) <sup>[b]</sup> | 2009<br>cost<br>(\$/mol) <sup>[c]</sup> |
|-------------------------------------------------------|--------------------------------------|--------------------------------------|-----------------------------------------|
| triphenylphosphine                                    | 9                                    | 28                                   | 24                                      |
| tri- <i>t</i> -butylphosphine                         | 5,500                                | 5,503                                | 5,827                                   |
| dppe (diphos)                                         | 235                                  | 1183                                 | 972                                     |
| dppp                                                  | 404                                  | 2,145                                | 1,914                                   |
| dppf                                                  | 438                                  | 2,850                                | 7,983                                   |
| xantphos                                              | 984                                  | 10,207                               | 23,145                                  |
| Pd(OAc) <sub>2</sub>                                  | 5,735                                | 7,490                                | 6,062                                   |
| NiCl <sub>2</sub> (PPh <sub>3</sub> ) <sub>2</sub>    | 1,260                                | 1,727                                | 1,308                                   |
| Rh <sub>2</sub> (OAc) <sub>4</sub>                    | 60,996                               | 60,996                               | 81,991                                  |
| RhCl(PPh <sub>3</sub> ) <sub>3</sub>                  | 48,852                               | 75,129                               | 72,538                                  |
| [IrCl(C <sub>8</sub> H <sub>12</sub> ) <sub>2</sub> ] | 62,872                               | 62,872                               | 49,438                                  |
| MeAu(PPh <sub>3</sub> )                               | 155,093                              | 155,093                              | 105,292                                 |
| Grubbs 1 <sup>st</sup> generation                     | 50,036                               | -                                    | 59,889                                  |
| Grubbs 2 <sup>nd</sup> generation                     | 139,231                              | -                                    | 190,382                                 |
| RuHCl(CO)(PPh <sub>3</sub> ) <sub>3</sub>             | 54,782                               | 54,858                               | 56,763                                  |

[a] This table was compiled from the least expensive major supplier for each compound as of August 2018. [b] Commercial prices from G, as of August 2018. [c] Commercial prices from G, as of October 2009.



**Table S6.** Prices (in US dollars) of common chemicals in 2018

| compound                       | MW     | supplier | purity % | quantity g | cost (for quantity) | cost \$/g | cost \$/mol |
|--------------------------------|--------|----------|----------|------------|---------------------|-----------|-------------|
| (-)-menthol                    | 156.27 | A        | >99      | 25000      | 2253                | 0.09      | 14          |
| (-)-menthol                    | 156.27 | B        |          | 1000       | 250                 | 0.25      | 39          |
| (-)-menthol                    | 156.27 | C        |          | 5000       | 450                 | 0.09      | 14          |
| (-)-menthol                    | 156.27 | D        | 99       | 1000       | 230                 | 0.23      | 36          |
| (-)-menthol                    | 156.27 | E        |          | 500        | 109                 | 0.22      | 34          |
| (-)-menthol                    | 156.27 | F        | 99.5     | 2500       | 423                 | 0.17      | 26          |
| (EtO) <sub>2</sub> P(O)H       | 138.1  | A        | 94       | 1072       | 96.5                | 0.09      | 12          |
| (EtO) <sub>2</sub> P(O)H       | 138.1  | D        | 96       | 1000       | 192                 | 0.19      | 27          |
| (EtO) <sub>2</sub> P(O)H       | 138.1  | G        | 95       | 500        | 117                 | 0.23      | 32          |
| (EtO) <sub>2</sub> P(O)H       | 138.1  | H        | 99       | 1000       | 125                 | 0.13      | 17          |
| (iPrO) <sub>2</sub> P(O)H      | 166.16 | G        | 98       | 250        | 218                 | 0.87      | 145         |
| (iPrO) <sub>2</sub> P(O)H      | 166.16 | H        | 98       | 500        | 165                 | 0.33      | 55          |
| (iPrO) <sub>2</sub> P(O)H      | 166.16 | I        | 97       | 1000       | 252                 | 0.25      | 42          |
| (MeO) <sub>2</sub> P(O)H       | 110.05 | A        | 98       | 500        | 55.7                | 0.11      | 12          |
| (MeO) <sub>2</sub> P(O)H       | 110.05 | H        | 98       | 2500       | 180                 | 0.07      | 8           |
| (PhO) <sub>2</sub> P(O)H       | 234.19 | A        |          | 500        | 69.6                | 0.14      | 33          |
| (PhO) <sub>2</sub> P(O)H       | 234.19 | H        |          | 3000       | 150                 | 0.05      | 12          |
| (PhO) <sub>3</sub> P           | 310.29 | A        | 97       | 3000       | 178.5               | 0.06      | 18          |
| (PhO) <sub>3</sub> P           | 310.29 | D        | 97       | 2500       | 114                 | 0.05      | 14          |
| (PhO) <sub>3</sub> P           | 310.29 | G        | 97       | 2000       | 156                 | 0.08      | 24          |
| (PhO) <sub>3</sub> P           | 310.29 | H        | 97       | 2500       | 145                 | 0.06      | 18          |
| (R)-BINAP                      | 622.67 | A        |          | 0.5        | 58.3                | 116.60    | 72603       |
| (R)-BINAP                      | 622.67 | D        | 98       | 5          | 408                 | 81.60     | 50810       |
| (R)-BINAP                      | 622.67 | G        | 98       | 5          | 288                 | 57.60     | 35866       |
| (R)-SEGPPOS                    | 610.57 | A        | >94      | 0.1        | 34.6                | 346.00    | 211257      |
| (R)-SEGPPOS                    | 610.57 | E        | >99      | 1          | 156                 | 156.00    | 95249       |
| (R)-SEGPPOS                    | 610.57 | G        | 98       | 5          | 341                 | 68.20     | 41641       |
| (S)-(-)-1-Phenylethylamine     | 121.18 | A        | 98       | 100        | 146                 | 1.46      | 177         |
| (S)-(-)-1-Phenylethylamine     | 121.18 | D        | 98       | 500        | 479                 | 0.96      | 116         |
| (S)-(-)-1-Phenylethylamine     | 121.18 | H        | 98       | 2000       | 345                 | 0.17      | 21          |
| (S)-BINAP                      | 622.67 | A        |          | 0.5        | 76.7                | 153.40    | 95518       |
| (S)-BINAP                      | 622.67 | D        | 97       | 5          | 317                 | 63.40     | 39477       |
| (S)-BINAP                      | 622.67 | G        | 98       | 5          | 288                 | 57.60     | 35866       |
| (S)-SEGPPOS                    | 610.57 | A        | >94      | 0.1        | 38.1                | 381.00    | 232627      |
| (S)-SEGPPOS                    | 610.57 | E        | >99      | 1          | 143                 | 143.00    | 87312       |
| (S)-SEGPPOS                    | 610.57 | G        | 98       | 5          | 341                 | 68.20     | 41641       |
| ( <i>t</i> -Bu) <sub>3</sub> P | 202.32 | A        | 98       | 10         | 276                 | 27.60     | 5584        |

|                              |         |   |     |        |       |       |       |
|------------------------------|---------|---|-----|--------|-------|-------|-------|
| (t-Bu) <sub>3</sub> P        | 202.32  | D | 98  | 5      | 276   | 55.20 | 11168 |
| (t-Bu) <sub>3</sub> P        | 202.32  | G | 99  | 25     | 680   | 27.20 | 5503  |
| [C4-mim]BF <sub>4</sub>      | 226.03  | D |     | 50     | 202   | 4.04  | 913   |
| [C4-mim]BF <sub>4</sub>      | 226.02  | E |     | 100    | 298   | 2.98  | 674   |
| [C4-mim]Br                   | 219.12  | A |     | 50     | 99.7  | 1.99  | 437   |
| [C4-mim]Br                   | 219.12  | E |     | 5      | 57    | 11.4  | 2498  |
| [C4-mim]Cl                   | 174.67  | D |     | 50     | 92    | 1.84  | 323   |
| [C4-mim]Cl                   | 174.675 | E |     | 100    | 128   | 1.28  | 224   |
| [C4-mim]NO <sub>3</sub>      | 201.22  | A |     | 50     | 749   | 14.98 | 3014  |
| [C4-mim]NTf <sub>2</sub>     | 419.36  | A |     | 5      | 488   | 97.6  | 40929 |
| [C4-mim]NTf <sub>2</sub>     | 419.36  | E |     | 25     | 480   | 19.20 | 8052  |
| [C4-mim]PF <sub>6</sub>      | 284.18  | A |     | 250    | 771   | 3.08  | 876   |
| [C4-mim]PF <sub>6</sub>      | 284.19  | D |     | 100    | 258   | 2.58  | 733   |
| [C4-mim]PF <sub>6</sub>      | 284.18  | E |     | 25     | 87    | 3.48  | 989   |
| 1-bromobutane                | 137.02  | A | 99  | 2500   | 167   | 0.07  | 9     |
| 1-bromobutane                | 137.03  | D | 98+ | 10000  | 300   | 0.03  | 4     |
| 1-bromobutane                | 137.02  | E | 99  | 500    | 27    | 0.05  | 7     |
| 1-bromobutane                | 137.02  | F | 99  | 12760  | 468   | 0.04  | 5     |
| 1-bromobutane                | 137.03  | H | 99  | 5000   | 135   | 0.03  | 4     |
| 1-bromooctane                | 193.13  | A | 98  | 500    | 60.8  | 0.12  | 23    |
| 1-bromooctane                | 193.13  | D | 98+ | 5000   | 307   | 0.06  | 12    |
| 1-bromooctane                | 193.13  | E | 99  | 559    | 48    | 0.09  | 17    |
| 1-bromooctane                | 193.13  | H | 99  | 4000   | 199   | 0.05  | 10    |
| 1-chloro-4-iodobutane        | 218.46  | A | 98  | 44.625 | 281   | 6.29  | 1373  |
| 1-chloro-4-iodobutane        | 218.46  | E |     | 25     | 138   | 5.52  | 1206  |
| 1-chloro-4-iodobutane        | 218.47  | H | 98  | 500    | 1495  | 2.99  | 653   |
| 1-methylimidazole            | 82.1    | A | 99  | 3000   | 430   | 0.14  | 12    |
| 1-methylimidazole            | 82.11   | D | 99  | 2000   | 273   | 0.14  | 11    |
| 1-methylimidazole            | 82.11   | E | 99  | 500    | 92    | 0.18  | 15    |
| 1-methylimidazole            | 82.11   | F | 99  | 5000   | 604   | 0.12  | 10    |
| 1-methylimidazole            | 82.11   | H | 99  | 4000   | 280   | 0.07  | 6     |
| 1-octene                     | 112.21  | A | 98  | 5000   | 229   | 0.05  | 5     |
| 1-octene                     | 112.21  | D | 99  | 1787.5 | 82    | 0.05  | 5     |
| 1-octene                     | 112.21  | F | 99  | 7150   | 242   | 0.03  | 4     |
| 1-octene                     | 112.21  | H | 97  | 500    | 36    | 0.07  | 8     |
| 1-octene                     | 112.21  | J | 98  | 12000  | 241.8 | 0.02  | 2     |
| 1,1,3,3-Tetramethylguanidine | 115.18  | A | 99  | 25000  | 2160  | 0.09  | 10    |
| 1,1,3,3-Tetramethylguanidine | 115.18  | D | 99  | 459    | 170   | 0.37  | 43    |
| 1,1,3,3-Tetramethylguanidine | 115.18  | H | 98  | 2500   | 310   | 0.12  | 14    |
| 1,2-dichloroethane           | 98.96   | H | 99  | 251200 | 1650  | 0.01  | 1     |

|                                |        |   |     |       |      |        |       |
|--------------------------------|--------|---|-----|-------|------|--------|-------|
| 2-furoyl chloride              | 130.53 | A | 95  | 100   | 123  | 1.23   | 161   |
| 2-furoyl chloride              | 130.53 | D | 95  | 250   | 169  | 0.68   | 88    |
| 2-furoyl chloride              | 130.53 | E |     | 500   | 298  | 0.60   | 78    |
| 2-furoyl chloride              | 130.53 | H | 97  | 5     | 10   | 2.00   | 261   |
| 2-furoyl chloride              | 130.53 | K | 97  | 10000 | 3208 | 0.32   | 42    |
| 2-furoyl chloride              | 130.53 | L | 98  | 500   | 396  | 0.79   | 103   |
| 2-iodopropane                  | 169.99 | A | 99  | 500   | 134  | 0.27   | 45    |
| 2-iodopropane                  | 169.99 | D | 98+ | 500   | 133  | 0.27   | 45    |
| 2-iodopropane                  | 169.99 | E |     | 500   | 210  | 0.42   | 71    |
| 2-iodopropane                  | 169.99 | F | 98+ | 851.5 | 192  | 0.23   | 38    |
| 2-iodopropane                  | 169.99 | H | 99  | 500   | 113  | 0.23   | 38    |
| 2-iodopyridine                 | 205    | A | 98  | 5     | 109  | 21.70  | 4449  |
| 2-iodopyridine                 | 205    | D | 95  | 25    | 220  | 8.80   | 1804  |
| 2-iodopyridine                 | 205    | M | 97  | 5     | 20   | 4.00   | 820   |
| 2-naphthaldehyde               | 156.18 | A | 98  | 100   | 424  | 4.24   | 662   |
| 2-naphthaldehyde               | 156.18 | C |     | 1000  | 680  | 0.68   | 106   |
| 2-naphthaldehyde               | 156.18 | D | 98  | 100   | 359  | 3.59   | 561   |
| 2-naphthaldehyde               | 156.18 | H | 98+ | 500   | 440  | 0.88   | 137   |
| 2-vinylpyridine                | 105.14 | A | 97  | 487.5 | 110  | 0.23   | 24    |
| 2-vinylpyridine                | 105.14 | D | 97  | 487   | 85   | 0.17   | 18    |
| 2-vinylpyridine                | 105.14 | E |     | 487   | 134  | 0.28   | 29    |
| 2-vinylpyridine                | 105.14 | F | 97  | 975   | 160  | 0.16   | 17    |
| 2-vinylpyridine                | 105.14 | H | 95  | 25    | 27   | 1.08   | 114   |
| 2,5-dihydroxybenzaldehyde      | 138.12 | A | 98  | 25    | 308  | 12.30  | 1699  |
| 2,5-dihydroxybenzaldehyde      | 138.12 | D | 98+ | 25    | 259  | 10.36  | 1431  |
| 2,5-dihydroxybenzaldehyde      | 138.12 | E |     | 5     | 62   | 12.40  | 1713  |
| 2,5-dihydroxybenzaldehyde      | 138.12 | F | 99  | 25    | 232  | 9.26   | 1279  |
| 2,5-dihydroxybenzaldehyde      | 138.12 | H | 98  | 1     | 25   | 25.00  | 3453  |
| 2,5-dimethoxy-2,5-dihydrofuran | 130.14 | A | 97  | 100   | 86   | 0.86   | 112   |
| 2,5-dimethoxy-2,5-dihydrofuran | 130.14 | D | 97  | 1000  | 414  | 0.41   | 54    |
| 2,5-dimethoxy-2,5-dihydrofuran | 130.14 | H | 99  | 25    | 29   | 1.16   | 151   |
| 2,5-dimethoxy-2,5-dihydrofuran | 130.14 | O | 97  | 1000  | 365  | 0.37   | 48    |
| 20% Pd(OH) <sub>2</sub> -C     | 140.43 | A | 20  | 100   | 4730 | 47.30  | 6642  |
| 20% Pd(OH) <sub>2</sub> -C     | 140.43 | D | 20  | 10    | 1657 | 165.70 | 23269 |
| 20% Pd(OH) <sub>2</sub> -C     | 140.43 | H |     | 10    | 700  | 70.00  | 9830  |
| 3-Aminopropyltriethoxysilane   | 221.37 | A | >98 | 465   | 203  | 0.44   | 97    |
| 3-Aminopropyltriethoxysilane   | 221.37 | H | 97  | 500   | 49   | 0.10   | 22    |
| 3-Aminopropyltriethoxysilane   | 221.37 | J | 85  | 16000 | 464  | 0.03   | 6     |
| 3,4-dibromothiophene           | 241.93 | A | 99  | 25    | 352  | 14.08  | 3406  |
| 3,4-dibromothiophene           | 241.94 | D | 98+ | 25    | 310  | 12.40  | 3000  |

|                                                    |        |   |       |        |      |         |        |
|----------------------------------------------------|--------|---|-------|--------|------|---------|--------|
| 3,4-dibromothiophene                               | 241.94 | E | 98    | 25     | 147  | 5.88    | 1423   |
| 3,4-dibromothiophene                               | 241.94 | F | 97    | 25     | 225  | 9.02    | 2181   |
| 3,4-dibromothiophene                               | 241.94 | H | 98+   | 500    | 180  | 0.36    | 87     |
| 3,4-Dibromothiophene                               | 241.93 | N | 97    | 1000   | 250  | 0.25    | 60     |
| 3,4-Dibromothiophene                               | 241.93 | O | 95    | 1000   | 325  | 0.33    | 79     |
| 3,4-Dibromothiophene                               | 241.93 | P | 98    | 1000   | 194  | 0.19    | 47     |
| 3A molecular sieves                                |        | A |       | 5000   | 393  | 0.08    | 0      |
| 3A molecular sieves                                |        | D |       | 5000   | 316  | 0.06    | 0      |
| 4-phenyl-1-butene                                  | 132.21 | A | 99    | 44     | 340  | 7.73    | 1022   |
| 4-phenyl-1-butene                                  | 132.21 | E | 99    | 22     | 154  | 7.00    | 925    |
| 4-phenyl-1-butene                                  | 132.21 | H | 98    | 25     | 105  | 4.20    | 555    |
| 4,4,5,5-tetramethyl-1,3,2-dioxaphospholane 2-oxide | 164.14 | A | 95    | 1      | 78   | 78.40   | 12869  |
| 4,4,5,5-tetramethyl-1,3,2-dioxaphospholane 2-oxide | 164.14 | E | 95    | 5      | 248  | 49.60   | 8141   |
| 5-bromo-1-pentene                                  | 149.03 | A | 95    | 25     | 162  | 6.46    | 963    |
| 5-bromo-1-pentene                                  | 149.03 | D | 96    | 25     | 161  | 6.44    | 960    |
| 5-bromo-1-pentene                                  | 149.03 | E |       | 25     | 58   | 2.32    | 346    |
| 5-bromo-1-pentene                                  | 149.03 | F | 95    | 50     | 289  | 5.77    | 860    |
| 5-bromo-1-pentene                                  | 149.03 | H | 98    | 500    | 570  | 1.14    | 170    |
| 5-bromo-1-pentene                                  | 149.03 | L |       | 250    | 529  | 2.12    | 315    |
| 9-Mesityl-10-methylacridinium perchlorate          | 411.88 | A | 95    | 0.1    | 110  | 1100.00 | 453068 |
| 9-Mesityl-10-methylacridinium perchlorate          | 411.88 | I | 98    | 1      | 235  | 235.00  | 96792  |
| 9-Mesityl-10-methylacridinium perchlorate          | 411.88 | R | 98    | 1      | 193  | 193.00  | 79493  |
| acetic acid                                        | 60.05  | H | 99    | 209800 | 995  | 0.00    | 0      |
| acetonitrile                                       | 41.05  | A |       | 14148  | 1064 | 0.08    | 3      |
| <b>acetonitrile</b>                                | 41.05  | H | 99    | 157200 | 1295 | 0.01    | 1      |
| Ag <sub>2</sub> CO <sub>3</sub>                    | 275.75 | A | 99    | 100    | 293  | 2.93    | 808    |
| Ag <sub>2</sub> CO <sub>3</sub>                    | 275.75 | D | 99.5  | 100    | 303  | 3.03    | 836    |
| Ag <sub>2</sub> CO <sub>3</sub>                    | 275.75 | G | 99+   | 50     | 244  | 4.88    | 1346   |
| Ag <sub>2</sub> CO <sub>3</sub>                    | 275.75 | Q | 99    | 100    | 277  | 2.77    | 764    |
| AgCl                                               | 143.32 | A | 99    | 100    | 313  | 3.13    | 449    |
| AgCl                                               | 143.32 | D | 99.9  | 500    | 1957 | 3.91    | 561    |
| AgCl                                               | 143.32 | G | 99.9  | 50     | 180  | 3.60    | 516    |
| AgCl                                               | 143.32 | Q | >99   | 1000   | 1851 | 1.85    | 265    |
| AgNO <sub>3</sub>                                  | 169.87 | A | >99   | 500    | 1154 | 2.31    | 392    |
| AgNO <sub>3</sub>                                  | 169.87 | A | 99+   | 500    | 1186 | 2.37    | 403    |
| AgNO <sub>3</sub>                                  | 169.87 | D | >99.9 | 500    | 1054 | 2.11    | 358    |
| AgNO <sub>3</sub>                                  | 169.87 | D | 99.9+ | 500    | 1070 | 2.14    | 364    |
| AgNO <sub>3</sub>                                  | 169.87 | F | 99.85 | 2500   | 2640 | 1.06    | 179    |
| AgNO <sub>3</sub>                                  | 169.87 | G | 99.9  | 500    | 970  | 1.94    | 330    |

|                                                  |        |   |        |        |         |       |      |
|--------------------------------------------------|--------|---|--------|--------|---------|-------|------|
| AgNO <sub>3</sub>                                | 169.87 | G | 99.9   | 500    | 970     | 1.94  | 330  |
| AgNO <sub>3</sub>                                | 169.87 | H | 99     | 250    | 249     | 1.00  | 169  |
| AgNO <sub>3</sub>                                | 169.87 | H | 99     | 250    | 249     | 1.00  | 169  |
| AgNO <sub>3</sub>                                | 169.87 | Q | >99    | 500    | 1168    | 2.34  | 397  |
| AgOAc                                            | 166.91 | A | 99     | 100    | 410     | 4.10  | 684  |
| AgOAc                                            | 166.91 | D | 99     | 100    | 290     | 2.90  | 484  |
| AgOAc                                            | 166.91 | G | 99     | 50     | 156     | 3.12  | 521  |
| AgOAc                                            | 166.91 | H | 99     | 100    | 225     | 2.25  | 376  |
| AgOAc                                            | 166.91 | Q | 99     | 500    | 1646.71 | 3.29  | 550  |
| AgPF <sub>6</sub>                                | 252.83 | A | 98     | 10     | 264     | 26.40 | 6675 |
| AgPF <sub>6</sub>                                | 252.83 | D | 98     | 25     | 396     | 15.84 | 4005 |
| AgPF <sub>6</sub>                                | 252.83 | E |        | 5      | 105     | 21.00 | 5309 |
| AgPF <sub>6</sub>                                | 252.83 | F | 98     | 25     | 378     | 15.12 | 3823 |
| AgPF <sub>6</sub>                                | 252.83 | G | 99     | 25     | 318     | 12.72 | 3216 |
| AgPF <sub>6</sub>                                | 252.83 | H | 98     | 100    | 995     | 9.95  | 2516 |
| AIBN                                             | 164.21 | A | 98     | 100    | 124     | 1.24  | 204  |
| AlCl <sub>3</sub>                                | 133.34 | A | 99     | 500    | 106     | 0.21  | 28   |
| AlCl <sub>3</sub>                                | 133.34 | D | 99     | 5000   | 269     | 0.05  | 7    |
| AlCl <sub>3</sub>                                | 133.34 | E | 98     | 500    | 40      | 0.08  | 11   |
| AlCl <sub>3</sub>                                | 133.34 | G | 99     | 1000   | 192     | 0.19  | 26   |
| AlCl <sub>3</sub>                                | 133.34 | H | 99     | 4000   | 160     | 0.04  | 5    |
| Allylamine                                       | 57.09  | A | 98     | 761    | 177     | 0.23  | 13   |
| Allylamine                                       | 57.1   | D | 98+    | 380.5  | 176     | 0.46  | 26   |
| Allylamine                                       | 57.1   | F | 98+    | 190.25 | 54      | 0.28  | 16   |
| Allylamine                                       | 57.1   | H | 98     | 100    | 40      | 0.40  | 23   |
| Amano Lipase from <i>Pseudomonas fluorescens</i> |        | A |        | 50     | 135     | 2.70  | 0    |
| ammonium acetate                                 | 77.08  | A | >97    | 2500   | 188     | 0.08  | 6    |
| ammonium acetate                                 | 77.08  | D | 97     | 5000   | 182     | 0.04  | 3    |
| ammonium acetate                                 | 77.08  | H | 99     | 25000  | 675     | 0.03  | 2    |
| Ammonium hypophosphite                           | 83.03  | A | >97    | 1000   | 174     | 0.17  | 14   |
| anhydrous ether                                  | 74.12  | A | 98     | 141200 | 1963    | 0.01  | 1    |
| anhydrous ether                                  | 74.12  | D | 99     | 3000   | 172     | 0.06  | 4    |
| anhydrous ether                                  | 74.12  | H | 99.99  | 12708  | 250     | 0.02  | 1    |
| Anilinium hypophosphite                          | 159.12 | A | 97     | 25     | 39      | 1.56  | 248  |
| As <sub>2</sub> O <sub>3</sub>                   | 197.84 | A | 99     | 1000   | 216     | 0.22  | 43   |
| As <sub>2</sub> O <sub>3</sub>                   | 197.84 | D | 99.99  | 250    | 610     | 2.44  | 483  |
| As <sub>2</sub> O <sub>3</sub>                   | 197.84 | G |        | 250    | 78      | 0.31  | 62   |
| AsCl <sub>3</sub>                                | 181.28 | A | 99.99  | 50     | 259     | 5.17  | 937  |
| AsCl <sub>3</sub>                                | 181.28 | D | 99.999 | 100    | 326     | 3.26  | 591  |

|                                 |        |   |       |       |       |        |       |
|---------------------------------|--------|---|-------|-------|-------|--------|-------|
| AsCl <sub>3</sub>               | 181.28 | G | 99    | 100   | 238   | 2.38   | 431   |
| AuCl                            | 232.42 | A | 99.9  | 5     | 913   | 182.60 | 42440 |
| AuCl                            | 232.42 | D | 99.9  | 5     | 865   | 173.00 | 40209 |
| AuCl                            | 232.42 | G | 97    | 5     | 662   | 132.40 | 30772 |
| AuCl                            | 232.42 | Q | >99   | 5     | 787   | 157.30 | 36560 |
| AuCl <sub>3</sub>               | 303.33 | A | 99    | 5     | 605   | 121.00 | 36703 |
| AuCl <sub>3</sub>               | 303.33 | D | 99.9  | 5     | 503   | 100.60 | 30515 |
| AuCl <sub>3</sub>               | 303.33 | G | 99    | 5     | 442   | 88.40  | 26814 |
| AuCl <sub>3</sub>               | 303.33 | Q | 99    | 5     | 516   | 103.20 | 31304 |
| BaCl <sub>2</sub>               | 208.23 | A | 99.9  | 10    | 37    | 3.66   | 762   |
| BaCl <sub>2</sub>               | 208.25 | D | 99.95 | 5     | 38    | 7.64   | 1591  |
| BaCl <sub>2</sub>               | 208.24 | G | >98   | 100   | 25    | 0.25   | 52    |
| BCl <sub>3</sub>                | 117.17 | A | 99.9  | 454   | 531   | 1.17   | 137   |
| benzophenone                    | 182.22 | A | 99    | 2000  | 64    | 0.03   | 6     |
| benzophenone                    | 182.22 | D | 99    | 5000  | 171   | 0.03   | 6     |
| benzophenone                    | 182.22 | H | 98    | 500   | 66    | 0.13   | 24    |
| benzoquinone                    | 108.1  | A | >85   | 1000  | 138.5 | 0.14   | 15    |
| benzoquinone                    | 108.1  | D | 85    | 5000  | 357   | 0.07   | 8     |
| benzoquinone                    | 108.1  | H | 90    | 5000  | 305   | 0.06   | 7     |
| benzyl alcohol                  | 108.14 | A | 99.8  | 2090  | 329   | 0.16   | 17    |
| benzyl alcohol                  | 108.14 | D | 99    | 2500  | 99    | 0.04   | 4     |
| benzyl alcohol                  | 108.14 | H | 99    | 4180  | 165   | 0.04   | 4     |
| benzyl amine                    | 107.16 | A | >99   | 500   | 66    | 0.13   | 14    |
| benzyl amine                    | 107.16 | D | 99    | 5000  | 419   | 0.08   | 9     |
| benzyl amine                    | 107.16 | H | 99    | 3000  | 199   | 0.07   | 7     |
| Benzyl bromide                  | 171.04 | A | 98    | 2500  | 550   | 0.22   | 38    |
| Benzyl bromide                  | 171.04 | D | 99    | 1000  | 291   | 0.29   | 50    |
| Benzyl bromide                  | 171.04 | H | 98    | 2500  | 265   | 0.11   | 18    |
| Benzyl chloride                 | 126.58 | A | 99    | 2000  | 94    | 0.05   | 6     |
| Benzyl chloride                 | 126.58 | D | 99    | 10000 | 262   | 0.03   | 3     |
| Benzyl chloride                 | 126.58 | H | 99    | 4000  | 128   | 0.03   | 4     |
| benzylmagnesium chloride        | 150.89 | A | 1M    |       | 194   |        | 243   |
| benzylmagnesium chloride        | 150.89 | D | 1M    |       | 838   |        | 1676  |
| benzylmagnesium chloride        | 150.89 | G | 1-2M  |       | 446   |        | 446   |
| BeO                             | 25.01  | A | 99.98 | 100   | 801   | 8.01   | 200   |
| BeO                             | 25.01  | D | 99    | 25    | 144   | 5.75   | 144   |
| BeO                             | 25.01  | G | 99.95 | 25    | 195   | 7.80   | 195   |
| Bi(OAc) <sub>3</sub>            | 386.12 | D | 99    | 250   | 307   | 1.23   | 474   |
| Bi(OAc) <sub>3</sub>            | 386.12 | G | 99    | 100   | 386   | 3.86   | 1490  |
| Bi <sub>2</sub> SO <sub>4</sub> | 706.13 | D | 99    | 100   | 83    | 0.83   | 584   |

|                                             |        |   |      |       |     |        |        |
|---------------------------------------------|--------|---|------|-------|-----|--------|--------|
| BiCl <sub>3</sub>                           | 315.34 | A | 98   | 500   | 884 | 1.77   | 558    |
| BiCl <sub>3</sub>                           | 315.34 | D | 99.9 | 100   | 209 | 2.09   | 659    |
| BiCl <sub>3</sub>                           | 315.34 | E | 97   | 250   | 116 | 0.46   | 146    |
| BiCl <sub>3</sub>                           | 315.34 | G | 99   | 100   | 162 | 1.62   | 511    |
| BiCl <sub>3</sub>                           | 315.34 | H | 98   | 500   | 179 | 0.36   | 113    |
| Br <sub>2</sub>                             | 159.81 | A |      | 500   | 154 | 0.31   | 49     |
| Br <sub>2</sub>                             | 159.81 | D | 99.5 | 2500  | 867 | 0.35   | 55     |
| Br <sub>2</sub>                             | 159.81 | G | 99.5 | 1000  | 107 | 0.11   | 17     |
| Bu <sub>4</sub> NI                          | 369.37 | A | 98   | 500   | 244 | 0.49   | 180    |
| Bu <sub>4</sub> NI                          | 369.37 | D | 98   | 1000  | 325 | 0.33   | 120    |
| Bu <sub>4</sub> NI                          | 369.37 | H | 98   | 500   | 110 | 0.22   | 81     |
| butyl nitrate                               | 119.12 | H |      | 1     | 282 | 282.00 | 33592  |
| C11H23CO2H (lauric acid)                    | 200.32 | A | >98  | 25000 | 375 | 0.01   | 3      |
| C11H23CO2H (lauric acid)                    | 200.32 | E | >98  | 500   | 22  | 0.04   | 9      |
| C11H23CO2H (lauric acid)                    | 200.32 | H | 99   | 100   | 45  | 0.45   | 22     |
| CaCl <sub>2</sub>                           | 110.98 | A | ≥96  | 100   | 74  | 0.74   | 82     |
| CaCl <sub>2</sub>                           | 110.98 | D | ≥96  | 50    | 50  | 1.00   | 111    |
| CaCl <sub>2</sub>                           | 110.98 | H | 95   | 20000 | 195 | 0.01   | 1      |
| CaCl <sub>2</sub>                           | 110.98 | Q | 96   | 25    | 14  | 0.56   | 62     |
| CdCl <sub>2</sub>                           | 183.32 | A |      | 100   | 100 | 1.00   | 183    |
| CdCl <sub>2</sub>                           | 183.32 | D | 99   | 500   | 299 | 0.60   | 110    |
| CdCl <sub>2</sub>                           | 183.32 | G | 99   | 250   | 197 | 0.79   | 144    |
| CdCl <sub>2</sub>                           | 183.32 | H | 99   | 25    | 14  | 0.56   | 103    |
| CeCl <sub>3</sub>                           | 246.48 | A | 99.9 | 50    | 333 | 6.66   | 1642   |
| CeCl <sub>3</sub>                           | 246.48 | D | 99.5 | 250   | 699 | 2.80   | 689    |
| CeCl <sub>3</sub>                           | 246.48 | F | 99.9 | 100   | 565 | 5.65   | 1392   |
| CeCl <sub>3</sub>                           | 246.48 | G | 99.9 | 100   | 366 | 3.66   | 902    |
| CeCl <sub>3</sub>                           | 246.48 | H | 99   | 500   | 245 | 0.49   | 121    |
| Chloro-1,5-cyclooctadiene iridium (I) dimer | 671.7  | A |      | 2     | 323 | 161.50 | 108480 |
| Chloro-1,5-cyclooctadiene iridium (I) dimer | 671.71 | D |      | 5     | 811 | 162.20 | 108951 |
| Chloro-1,5-cyclooctadiene iridium (I) dimer | 671.7  | E |      | 1     | 139 | 139.00 | 93366  |
| Chloro-1,5-cyclooctadiene iridium (I) dimer | 671.7  | F |      | 5     | 517 | 103.30 | 69387  |
| Chloro-1,5-cyclooctadiene iridium (I) dimer | 671.71 | G | 99   | 10    | 936 | 93.60  | 62872  |
| chlorodicyclohexylphosphine                 | 232.73 | A | 97   | 5     | 250 | 49.90  | 11613  |
| chlorodicyclohexylphosphine                 | 232.73 | E |      | 5     | 217 | 43.40  | 10100  |
| chlorodicyclohexylphosphine                 | 232.73 | F | 97   | 5     | 214 | 42.75  | 9949   |
| chlorodicyclohexylphosphine                 | 232.73 | G | 98   | 5     | 208 | 41.60  | 9682   |
| chloroform                                  | 118.38 | H | 99.9 | 5968  | 110 | 0.02   | 2      |

|                                 |        |   |        |      |     |       |      |
|---------------------------------|--------|---|--------|------|-----|-------|------|
| choline chloride                | 139.62 | A |        | 5000 | 341 | 0.07  | 10   |
| choline chloride                | 139.62 | E |        | 500  | 39  | 0.08  | 11   |
| Cl <sub>2</sub>                 | 70.91  | A | 99.5   | 454  | 339 | 0.75  | 53   |
| Co(acac) <sub>3</sub>           | 356.26 | A | 98     | 100  | 156 | 1.56  | 554  |
| Co(acac) <sub>3</sub>           | 356.26 | D |        | 100  | 117 | 1.17  | 417  |
| Co(acac) <sub>3</sub>           | 356.26 | G | 98     | 250  | 227 | 0.91  | 323  |
| Co(acac) <sub>3</sub>           | 356.26 | Q |        | 100  | 120 | 1.20  | 428  |
| Co(OAc) <sub>2</sub>            | 177.02 | A | 99.995 | 10   | 157 | 15.70 | 2779 |
| Co(OAc) <sub>2</sub>            | 177.02 | D | 98+    | 250  | 784 | 3.14  | 555  |
| Co(Oac) <sub>2</sub>            | 177.02 | H | 99     | 25   | 165 | 6.60  | 1168 |
| CoCl <sub>2</sub>               | 129.84 | A | 97     | 500  | 460 | 0.92  | 119  |
| CoCl <sub>2</sub>               | 129.84 | D | 97     | 500  | 275 | 0.55  | 71   |
| CoCl <sub>2</sub>               | 129.84 | G | >99    | 100  | 102 | 1.02  | 132  |
| CoCl <sub>2</sub>               | 129.84 | Q | 97     | 500  | 282 | 0.56  | 73   |
| Cr <sub>2</sub> O <sub>3</sub>  | 151.99 | A | 98     | 100  | 624 | 6.24  | 948  |
| Cr <sub>2</sub> O <sub>3</sub>  | 151.99 | D | >98    | 2000 | 81  | 0.04  | 6    |
| Cr <sub>2</sub> O <sub>3</sub>  | 151.99 | G | 98     | 1000 | 77  | 0.08  | 12   |
| Cr <sub>2</sub> O <sub>3</sub>  | 151.99 | Q | 99     | 2500 | 167 | 0.07  | 10   |
| CrCl <sub>2</sub>               | 122.9  | A | 95     | 25   | 629 | 25.16 | 3092 |
| CrCl <sub>2</sub>               | 122.9  | D | 99.9   | 25   | 237 | 9.48  | 1165 |
| CrCl <sub>2</sub>               | 122.9  | G | 99.9   | 25   | 296 | 11.84 | 1455 |
| CrCl <sub>2</sub>               | 122.9  | Q | 97     | 100  | 533 | 5.33  | 655  |
| CrCl <sub>3</sub>               | 158.36 | A | 99     | 100  | 315 | 3.15  | 499  |
| CrCl <sub>3</sub>               | 158.36 | D | 98     | 250  | 200 | 0.80  | 127  |
| CrCl <sub>3</sub>               | 158.36 | G | 99     | 250  | 208 | 0.83  | 132  |
| CrCl <sub>3</sub>               | 158.36 | Q | 99     | 250  | 208 | 0.83  | 131  |
| CrO <sub>3</sub>                | 99.99  | A | >99.99 | 25   | 75  | 2.99  | 299  |
| CrO <sub>3</sub>                | 99.99  | D | 99     | 5000 | 182 | 0.04  | 4    |
| CrO <sub>3</sub>                | 99.99  | G | 99.5   | 2000 | 176 | 0.09  | 9    |
| CrO <sub>3</sub>                | 99.99  | H | 99     | 2500 | 66  | 0.03  | 3    |
| CrO <sub>3</sub>                | 99.99  | Q | 99.5   | 5000 | 191 | 0.04  | 4    |
| Cs <sub>2</sub> CO <sub>3</sub> | 325.82 | A | 99     | 500  | 313 | 0.63  | 204  |
| Cs <sub>2</sub> CO <sub>3</sub> | 325.82 | D | 99     | 1000 | 463 | 0.46  | 151  |
| Cs <sub>2</sub> CO <sub>3</sub> | 325.82 | G | 99+    | 500  | 224 | 0.45  | 146  |
| Cs <sub>2</sub> CO <sub>3</sub> | 325.82 | H | 99     | 100  | 18  | 0.18  | 59   |
| CsCl                            | 168.36 | A | 99.90  | 25   | 65  | 2.61  | 440  |
| CsCl                            | 168.36 | D | 99.90  | 25   | 50  | 2.02  | 339  |
| CsCl                            | 168.36 | G | >99    | 25   | 37  | 1.48  | 249  |
| CsCl                            | 168.36 | H | 99     | 100  | 60  | 0.60  | 101  |
| CuCl                            | 99     | A | 97     | 2000 | 182 | 0.09  | 9    |



|                                                                           |        |   |      |        |      |        |        |
|---------------------------------------------------------------------------|--------|---|------|--------|------|--------|--------|
| CuCl                                                                      | 99     | D | 97   | 2000   | 108  | 0.05   | 5      |
| CuCl                                                                      | 99     | G | >97  | 1000   | 108  | 0.11   | 11     |
| CuCl                                                                      | 99     | H | 98   | 10000  | 595  | 0.06   | 6      |
| CuCl                                                                      | 99     | Q | 97   | 2000   | 113  | 0.06   | 6      |
| CuCl <sub>2</sub>                                                         | 134.45 | A | 97   | 1000   | 172  | 0.17   | 23     |
| CuCl <sub>2</sub>                                                         | 134.45 | D | 98   | 1000   | 106  | 0.11   | 14     |
| CuCl <sub>2</sub>                                                         | 134.45 | G | >98  | 500    | 88   | 0.18   | 24     |
| CuCl <sub>2</sub>                                                         | 134.45 | Q | 99   | 2500   | 113  | 0.05   | 6      |
| CuI                                                                       | 190.44 | A | 98   | 1000   | 303  | 0.30   | 58     |
| CuI                                                                       | 190.44 | D | 98   | 1000   | 254  | 0.25   | 48     |
| CuI                                                                       | 190.44 | G | 98   | 500    | 130  | 0.26   | 50     |
| CuI                                                                       | 190.44 | H | 98   | 1000   | 104  | 0.10   | 20     |
| Cy <sub>2</sub> PCI                                                       | 232.74 | A | 97   | 5      | 250  | 49.90  | 11614  |
| Cy <sub>2</sub> PCI                                                       | 232.74 | P | 98   | 100    | 537  | 5.37   | 1250   |
| Cy <sub>2</sub> PCI                                                       | 232.74 | S | 94   | 100    | 264  | 2.64   | 615    |
| cyclohexane                                                               | 84.16  | H | 99   | 155800 | 1295 | 0.01   | 1      |
| DBU                                                                       | 152.24 | A | 98   | 2500   | 855  | 0.34   | 52     |
| DBU                                                                       | 152.24 | D | 99   | 500    | 212  | 0.42   | 65     |
| DBU                                                                       | 152.24 | H | 99   | 4000   | 310  | 0.08   | 12     |
| dibenzyl phosphite                                                        | 262.24 | A |      | 100    | 336  | 3.36   | 881    |
| dibenzyl phosphite                                                        | 262.24 | D | 90+  | 100    | 250  | 2.50   | 656    |
| dibenzyl phosphite                                                        | 262.25 | E |      | 250    | 473  | 1.89   | 496    |
| dibenzyl phosphite                                                        | 262.25 | F | 95   | 100    | 247  | 2.47   | 648    |
| dibenzyl phosphite                                                        | 262.24 | H |      | 100    | 243  | 2.43   | 637    |
| Dichloro (3-phenyl-1H-inden-1-ylidene) bis(tricyclohexylphosphine) Ru(II) | 923.07 | A |      | 5      | 368  | 73.60  | 67938  |
| Dichloro (3-phenyl-1H-inden-1-ylidene) bis(tricyclohexylphosphine) Ru(II) | 923.09 | E |      | 1      | 178  | 178.00 | 164310 |
| Dichloro (3-phenyl-1H-inden-1-ylidene) bis(tricyclohexylphosphine) Ru(II) | 923.07 | G |      | 5      | 344  | 68.80  | 63507  |
| dichloromethane                                                           | 84.93  | A |      | 26400  | 690  | 0.03   | 2      |
| dichloromethane                                                           | 84.93  | H | 99   | 265000 | 1495 | 0.01   | 0      |
| diethyl chlorophosphite                                                   | 156.55 | A | 95   | 100    | 286  | 2.86   | 447    |
| diethyl chlorophosphite                                                   | 156.55 | D | 97   | 25     | 112  | 4.48   | 701    |
| diethyl ether                                                             | 74.12  | A |      | 14120  | 812  | 0.06   | 4      |
| diethyl ether                                                             | 74.12  | F |      | 17650  | 468  | 0.03   | 2      |
| Diethyl ether (anhydrous)                                                 | 74.12  | H | 99.9 | 12708  | 250  | 0.02   | 1      |
| diiodomethane                                                             | 267.84 | A | 99   | 500    | 343  | 0.69   | 184    |
| diiodomethane                                                             | 267.84 | D | 99   | 1000   | 408  | 0.41   | 109    |
| diiodomethane                                                             | 267.84 | H | 99   | 500    | 180  | 0.36   | 96     |
| dimethylformamide                                                         | 73.09  | A |      | 16992  | 837  | 0.05   | 4      |
| dimethylformamide                                                         | 73.09  | H | >99  | 188800 | 850  | 0.00   | 0      |

|                                                        |        |   |       |        |        |        |        |
|--------------------------------------------------------|--------|---|-------|--------|--------|--------|--------|
| dimethylglyoxime                                       | 116.12 | A | >97   | 500    | 131.5  | 0.26   | 31     |
| dimethylglyoxime                                       | 116.12 | D | 99    | 2500   | 439    | 0.18   | 20     |
| dimethylglyoxime                                       | 116.12 | H | 95    | 100    | 30     | 0.30   | 35     |
| dimethylsulfoxide                                      | 78.13  | A |       | 25000  | 363    | 0.01   | 1      |
| dioxane                                                | 88.11  | A |       | 18540  | 987    | 0.05   | 5      |
| dioxane                                                | 88.11  | H | 99    | 200000 | 3395   | 0.02   | 1      |
| DME                                                    | 90.12  | A | 99.5  | 15606  | 1233   | 0.08   | 7      |
| DME                                                    | 90.12  | D | 99+   | 2167   | 220    | 0.10   | 9      |
| DME                                                    | 90.12  | H | 99    | 173400 | 3795   | 0.02   | 2      |
| dppb                                                   | 426.48 | A | 98    | 25     | 184    | 7.36   | 3139   |
| dppb                                                   | 426.48 | D | 98    | 25     | 171    | 6.84   | 2917   |
| dppb                                                   | 426.48 | E | >98   | 25     | 114    | 4.56   | 1945   |
| dppb                                                   | 426.48 | F | 98    | 25     | 156    | 6.23   | 2655   |
| dppb                                                   | 426.48 | G | 98    | 50     | 351    | 7.02   | 2994   |
| dppb                                                   | 426.48 | H | 98    | 100    | 86     | 0.86   | 367    |
| dppe                                                   | 398.42 | A | 97    | 50     | 240.5  | 4.81   | 1916   |
| dppe                                                   | 398.42 | D | 97+   | 100    | 390    | 3.90   | 1554   |
| dppe                                                   | 398.42 | F | 98+   | 250    | 853.23 | 3.41   | 1360   |
| dppe                                                   | 398.42 | G | 99    | 100    | 297    | 2.97   | 1183   |
| dppe                                                   | 398.42 | H | 98    | 100    | 59     | 0.59   | 235    |
| dppf                                                   | 554.38 | A | 97    | 250    | 1555   | 6.22   | 3448   |
| dppf                                                   | 554.38 | D | 97    | 25     | 437    | 17.48  | 9691   |
| dppf                                                   | 554.38 | G | 99    | 250    | 1,285  | 5.14   | 2850   |
| dppf                                                   | 554.38 | H | 98    | 100    | 79     | 0.79   | 438    |
| dppfPdCl <sub>2</sub>                                  | 731.72 | D |       | 1      | 59     | 59.20  | 43318  |
| dppfPdCl <sub>2</sub>                                  | 721.7  | H | 96    | 100    | 1050   | 10.50  | 7578   |
| dppfPdCl <sub>2</sub> .CH <sub>2</sub> Cl <sub>2</sub> | 816.64 | A |       | 250    | 5250   | 21.00  | 17149  |
| dppfPdCl <sub>2</sub> .CH <sub>2</sub> Cl <sub>2</sub> | 816.64 | G |       | 25     | 396    | 15.84  | 12936  |
| dppp                                                   | 412.44 | A | 97    | 25     | 175    | 7.00   | 2887   |
| dppp                                                   | 412.44 | D | 97    | 100    | 622    | 6.22   | 2565   |
| dppp                                                   | 412.44 | F | 97    | 100    | 575.77 | 5.76   | 2375   |
| dppp                                                   | 412.44 | G | 98    | 50     | 260    | 5.20   | 2145   |
| dppp                                                   | 412.44 | H | 98    | 100    | 98     | 0.98   | 404    |
| dpppPdCl <sub>2</sub>                                  | 589.77 | A |       | 2      | 123    | 61.50  | 36271  |
| dpppPdCl <sub>2</sub>                                  | 589.77 | D |       | 1      | 225    | 225.00 | 132698 |
| dpppPdCl <sub>2</sub>                                  | 589.79 | E |       | 5      | 293    | 58.60  | 34562  |
| dpppPdCl <sub>2</sub>                                  | 589.77 | G |       | 5      | 252    | 50.40  | 29724  |
| DyCl <sub>3</sub>                                      | 268.86 | A | 99.99 | 25     | 782    | 31.28  | 8410   |
| DyCl <sub>3</sub>                                      | 268.86 | D | 99.98 | 25     | 822    | 32.88  | 8840   |
| DyCl <sub>3</sub>                                      | 268.86 | G | 99.9  | 50     | 238    | 4.76   | 1280   |

|                                 |        |   |        |        |       |        |       |
|---------------------------------|--------|---|--------|--------|-------|--------|-------|
| EG (ethylene glycol)            | 62.07  | A | >99    | 30000  | 839   | 0.03   | 2     |
| EG (ethylene glycol)            | 62.07  | D | 99     | 10000  | 205   | 0.02   | 1     |
| EG (ethylene glycol)            | 62.07  | H | 99     | 222600 | 795   | 0.00   | 0     |
| ErCl <sub>3</sub>               | 273.62 | A | 99.9   | 25     | 651   | 26.04  | 7125  |
| ErCl <sub>3</sub>               | 273.62 | D | 99.9   | 250    | 1113  | 4.45   | 1218  |
| ErCl <sub>3</sub>               | 273.62 | G | 99.9   | 25     | 182   | 7.28   | 1992  |
| Et <sub>3</sub> B               | 98     | A | >95    | 100    | 391   | 3.91   | 383   |
| Et <sub>3</sub> B               | 98     | G | 98     | 100    | 370   | 3.70   | 363   |
| Et <sub>3</sub> B               | 98     | T |        | 10     | 200   | 20.00  | 1960  |
| Et <sub>3</sub> B (1 M)         |        | A |        | 800 mL | 344.5 |        | 430   |
| Et <sub>3</sub> N               | 101.19 | A | >99.5  | 20000  | 497   | 0.02   | 3     |
| Et <sub>3</sub> N               | 101.19 | D | 99+    | 3000   | 132   | 0.04   | 4     |
| Et <sub>3</sub> N               | 101.19 | H | 99.5   | 150000 | 1800  | 0.01   | 1     |
| Et <sub>3</sub> SiOTf           | 264.34 | A | 99     | 50     | 322   | 6.44   | 1702  |
| Et <sub>3</sub> SiOTf           | 264.34 | H | 99     | 1000   | 1050  | 1.05   | 278   |
| Et <sub>3</sub> SiOTf           | 264.34 | J | 99     | 2500   | 2400  | 0.96   | 254   |
| Et <sub>3</sub> SiOTf           | 264.34 | M | 99     | 5000   | 1248  | 0.25   | 66    |
| ethanol                         | 46.07  | H | >99.5  | 157800 | 7800  | 0.05   | 2     |
| ethyl acetate                   | 88.11  | A |        | 16236  | 758   | 0.05   | 4     |
| ethyl acetate                   | 88.11  | H | 99.9   | 180400 | 795   | 0.00   | 0     |
| EuCl <sub>2</sub>               | 222.87 | A | 99.99  | 5      | 575   | 115.00 | 25630 |
| EuCl <sub>3</sub>               | 258.32 | A | >99.9  | 10     | 404   | 40.40  | 10436 |
| EuCl <sub>3</sub>               | 258.32 | D | 99.99  | 25     | 748   | 29.92  | 7729  |
| EuCl <sub>3</sub>               | 258.32 | G | 99.9   | 10     | 252   | 25.20  | 6510  |
| FeCl <sub>2</sub>               | 126.75 | A | 98     | 250    | 494   | 1.97   | 250   |
| FeCl <sub>2</sub>               | 126.75 | D | 99.5   | 250    | 427   | 1.71   | 216   |
| FeCl <sub>2</sub>               | 126.75 | G | 98     | 100    | 254   | 2.54   | 322   |
| FeCl <sub>2</sub>               | 126.75 | Q | 97     | 250    | 397   | 1.59   | 201   |
| FeCl <sub>3</sub>               | 162.2  | A | 97     | 20000  | 543   | 0.03   | 4     |
| FeCl <sub>3</sub>               | 162.2  | D | 98     | 25000  | 226   | 0.01   | 1     |
| FeCl <sub>3</sub>               | 162.2  | G | 98     | 5000   | 88    | 0.02   | 3     |
| FeCl <sub>3</sub>               | 162.2  | H | 98     | 500    | 45    | 0.09   | 15    |
| FeCl <sub>3</sub>               | 162.2  | Q | 98     | 1000   | 37    | 0.04   | 6     |
| furan                           | 68.07  | A | 98     | 468    | 56    | 0.12   | 8     |
| furan                           | 68.07  | D | 99     | 468    | 70    | 0.15   | 10    |
| furan                           | 68.07  | H | 99     | 100    | 20    | 0.20   | 14    |
| Ga <sub>2</sub> Cl <sub>4</sub> | 281.26 | A | 99.999 | 5      | 189   | 37.70  | 10604 |
| Ga <sub>2</sub> Cl <sub>4</sub> | 281.26 | D | 99.999 | 1      | 46    | 46.10  | 12966 |
| Ga <sub>2</sub> O <sub>3</sub>  | 187.44 | A | 99.99  | 50     | 327   | 6.53   | 1224  |
| Ga <sub>2</sub> O <sub>3</sub>  | 187.44 | D | 99.99  | 25     | 198   | 7.92   | 1485  |

|                                                   |        |   |             |        |      |        |        |
|---------------------------------------------------|--------|---|-------------|--------|------|--------|--------|
| GaCl <sub>3</sub>                                 | 176.08 | A | 99.99       | 50     | 286  | 5.72   | 1007   |
| GaCl <sub>3</sub>                                 | 176.08 | D | 99.999      | 100    | 397  | 3.97   | 699    |
| GaCl <sub>3</sub>                                 | 176.08 | E | 99.999      | 25     | 153  | 6.12   | 1078   |
| GaCl <sub>3</sub>                                 | 176.08 | G | 99.999      | 100    | 288  | 2.88   | 507    |
| GdCl <sub>3</sub>                                 | 263.61 | A | 99.99       | 25     | 585  | 23.40  | 6168   |
| GdCl <sub>3</sub>                                 | 263.61 | D | 99.99       | 25     | 492  | 19.68  | 5188   |
| GdCl <sub>3</sub>                                 | 263.61 | F | 99.9        | 25     | 411  | 16.44  | 4334   |
| GdCl <sub>3</sub>                                 | 263.61 | G | 99.9        | 50     | 304  | 6.08   | 1603   |
| Ge <sub>3</sub> N <sub>4</sub>                    | 273.95 | A | 99.99       | 5      | 204  | 40.70  | 11150  |
| GeBr <sub>2</sub>                                 | 232.45 | A | 97          | 5      | 182  | 36.40  | 8461   |
| GeCl <sub>2</sub> . dioxane                       | 231.65 | A |             | 10     | 248  | 24.80  | 5745   |
| GeCl <sub>2</sub> . dioxane                       | 231.65 | G |             | 10     | 192  | 19.20  | 4448   |
| GeCl <sub>4</sub>                                 | 214.45 | A | 99.99       | 25     | 365  | 14.60  | 3131   |
| GeCl <sub>4</sub>                                 | 214.45 | D | 99.999<br>9 | 500    | 2420 | 4.84   | 1038   |
| GeCl <sub>4</sub>                                 | 214.45 | G | 99.99       | 50     | 272  | 5.44   | 1167   |
| GeO <sub>2</sub>                                  | 104.64 | A | 99.99       | 25     | 221  | 8.82   | 923    |
| GeO <sub>2</sub>                                  | 104.64 | D | 99.99       | 50     | 732  | 14.64  | 1532   |
| GeO <sub>2</sub>                                  | 104.64 | G | 99.999      | 25     | 148  | 5.92   | 619    |
| Grubbs 1st generation                             | 822.96 | A | 97          | 50     | 3040 | 60.80  | 50036  |
| Grubbs 2nd generation                             | 848.97 | A |             | 10     | 1640 | 164.00 | 139231 |
| H <sub>3</sub> PO <sub>2</sub>                    | 66     | A | 50          | 16000  | 1133 | 0.07   | 5      |
| H <sub>3</sub> PO <sub>2</sub>                    | 66     | D | 50          | 2000   | 169  | 0.08   | 6      |
| H <sub>3</sub> PO <sub>2</sub> •NH <sub>3</sub>   | 83.03  | A | 97          | 1000   | 174  | 0.17   | 14     |
| H <sub>3</sub> PO <sub>2</sub> •PhNH <sub>2</sub> | 159.12 | A | 97          | 25     | 39   | 1.56   | 248    |
| H <sub>3</sub> PO <sub>2</sub> •PhNH <sub>2</sub> | 159.12 | U | 97          | 10     | 90   | 9.00   | 1432   |
| H <sub>3</sub> PO <sub>2</sub> •PhNH <sub>2</sub> | 159.12 | V | 97          | 500    | 1308 | 2.62   | 416    |
| H <sub>3</sub> PO <sub>3</sub>                    | 82     | A | 99          | 8000   | 666  | 0.08   | 7      |
| H <sub>3</sub> PO <sub>3</sub>                    | 82     | D | 98          | 5000   | 287  | 0.06   | 5      |
| H <sub>3</sub> PO <sub>4</sub>                    | 98     | A | 85          | 25000  | 235  | 0.01   | 1      |
| H <sub>3</sub> PO <sub>4</sub>                    | 98     | D | 85          | 10000  | 320  | 0.03   | 3      |
| H <sub>3</sub> PO <sub>4</sub>                    | 98     | G | 85          | 1000   | 52   | 0.05   | 5      |
| H <sub>3</sub> PO <sub>4</sub>                    | 98     | H | 85          | 330000 | 1276 | 0.00   | 0      |
| HBr                                               | 80.91  | A | 48          | 745    | 48   | 0.06   | 5      |
| HBr                                               | 80.91  | D | 47-49       | 5960   | 340  | 0.06   | 5      |
| HBr                                               | 80.91  | G | 48          | 5000   | 449  | 0.09   | 7      |
| HCl                                               | 36.46  | A | 37          | 18000  | 366  | 0.02   | 1      |
| HCl                                               | 36.46  | D | 36          | 3000   | 41   | 0.01   | 0      |
| Hexamethyldisilazane                              | 273.5  | A | >99         | 765    | 274  | 0.36   | 98     |

|                                        |        |   |        |        |       |        |        |
|----------------------------------------|--------|---|--------|--------|-------|--------|--------|
| Hexamethyldisilazane                   | 273.5  | D | 98+    | 100    | 260   | 2.60   | 711    |
| Hexamethyldisilazane                   | 273.5  | G | >97    | 500    | 109   | 0.22   | 60     |
| Hexamethyldisilazane                   | 273.5  | H | 98     | 13770  | 295   | 0.02   | 6      |
| hexane(s)                              | 86.18  | A |        | 11862  | 663   | 0.06   | 5      |
| hexane(s)                              | 86.18  | F |        | 16475  | 445   | 0.03   | 2      |
| hexane(s)                              | 86.18  | H | 99     | 131800 | 2200  | 0.02   | 1      |
| HfCl <sub>4</sub>                      | 320.3  | A | 98     | 50     | 93    | 1.86   | 597    |
| HfCl <sub>4</sub>                      | 320.3  | D | >98    | 25     | 48    | 1.90   | 609    |
| HfCl <sub>4</sub>                      | 320.3  | F | 99.00  | 25     | 70    | 2.78   | 890    |
| HfCl <sub>4</sub>                      | 320.3  | H | 96     | 5      | 48    | 9.60   | 3075   |
| Hg <sub>2</sub> Cl <sub>2</sub>        | 472.09 | A | 99.5   | 100    | 123   | 1.23   | 581    |
| Hg <sub>2</sub> Cl <sub>2</sub>        | 472.09 | D | 99.5   | 500    | 209   | 0.42   | 197    |
| Hg <sub>2</sub> Cl <sub>2</sub>        | 472.09 | G | 99.5   | 500    | 432   | 0.86   | 408    |
| HgCl <sub>2</sub>                      | 271.5  | A | 99     | 1000   | 350   | 0.35   | 95     |
| HgCl <sub>2</sub>                      | 271.5  | D | 98+    | 1000   | 291   | 0.29   | 79     |
| HgCl <sub>2</sub>                      | 271.5  | H | 99     | 500    | 145   | 0.29   | 79     |
| HgCl <sub>2</sub>                      | 271.5  | G | 99+    | 250    | 235   | 0.94   | 255    |
| HgCl <sub>2</sub>                      | 271.5  | F | 99.5   | 1000   | 241.5 | 0.24   | 65     |
| HI                                     | 127.91 | A | 55     | 1700   | 610   | 0.36   | 46     |
| HI                                     | 127.91 | D | 55-58  | 3400   | 731   | 0.22   | 28     |
| HMDS                                   | 201.4  | A | >99    | 765    | 274   | 0.36   | 72     |
| HMDS                                   | 201.4  | D | 98+    | 1912.5 | 260   | 0.14   | 27     |
| HMDS                                   | 201.4  | E | 98     | 382.5  | 71    | 0.19   | 37     |
| HMDS                                   | 201.4  | F | 98     | 1912.5 | 334   | 0.17   | 35     |
| HMDS                                   | 201.4  | G | 97     | 500    | 109   | 0.22   | 44     |
| HMDS                                   | 201.4  | H | 98     | 13770  | 295   | 0.02   | 4      |
| HoCl <sub>3</sub>                      | 271.29 | A | 99.9   | 5      | 189   | 37.80  | 10255  |
| HoCl <sub>3</sub>                      | 271.29 | D | 99.9   | 25     | 400   | 16.00  | 4341   |
| HoCl <sub>3</sub>                      | 271.29 | G | 99.9   | 25     | 254   | 10.16  | 2756   |
| Hoveyda-Grubbs catalyst 1st generation | 600.61 | A |        | 2      | 789   | 394.50 | 236941 |
| I <sub>2</sub>                         | 253.81 | A | 99.8   | 12000  | 3155  | 0.26   | 67     |
| I <sub>2</sub>                         | 253.81 | D | 99.8   | 500    | 212   | 0.42   | 108    |
| I <sub>2</sub>                         | 253.81 | E | 98     | 500    | 52    | 0.10   | 26     |
| imidazole                              | 68.08  | A | >99    | 1000   | 262   | 0.26   | 18     |
| imidazole                              | 68.08  | D | 99     | 2500   | 267   | 0.11   | 7      |
| imidazole                              | 68.08  | E |        | 500    | 76    | 0.15   | 10     |
| imidazole                              | 68.08  | F | 99     | 10000  | 999   | 0.10   | 7      |
| imidazole                              | 68.08  | H | 99+    | 100000 | 2995  | 0.03   | 2      |
| InBr                                   | 194.72 | A | 99.998 | 5      | 217   | 43.30  | 8431   |
| InBr                                   | 194.72 | D | 99.998 | 25     | 602   | 24.08  | 4689   |

|                                              |        |   |          |        |        |        |       |
|----------------------------------------------|--------|---|----------|--------|--------|--------|-------|
| InCl                                         | 150.27 | A | 99.999   | 2      | 201    | 100.25 | 15065 |
| InCl                                         | 150.27 | D | 99.995   | 25     | 412    | 16.48  | 2476  |
| InCl                                         | 150.27 | G | 99.99    | 10     | 310    | 31.00  | 4658  |
| InCl <sub>2</sub>                            | 185.72 | A | 99.9     | 10     | 204    | 20.40  | 3789  |
| InCl <sub>3</sub>                            | 221.18 | A | 98       | 50     | 343    | 6.85   | 1515  |
| InCl <sub>3</sub>                            | 221.18 | D | 98       | 25     | 143    | 5.72   | 1265  |
| InCl <sub>3</sub>                            | 221.18 | E | 99       | 25     | 184    | 7.36   | 1628  |
| InCl <sub>3</sub>                            | 221.18 | G | 99.999   | 100    | 506    | 5.06   | 1119  |
| InCl <sub>3</sub>                            | 221.18 | H | 98       | 100    | 178    | 1.78   | 394   |
| Iodobenzene                                  | 204.01 | A | 98       | 500    | 172    | 0.34   | 70    |
| Iodobenzene                                  | 204.01 | D | 98       | 1000   | 348    | 0.35   | 71    |
| Iodobenzene                                  | 204.01 | E |          | 500    | 149    | 0.30   | 61    |
| Iodobenzene                                  | 204.01 | F | 98       | 4550   | 987    | 0.22   | 44    |
| Iodobenzene                                  | 204.01 | H | 98       | 500    | 110    | 0.22   | 45    |
| iodomesitylene                               | 246.09 | D | 98       | 100    | 586    | 5.86   | 1442  |
| iodomesitylene                               | 246.09 | H | 98       | 100    | 175    | 1.75   | 431   |
| iPr <sub>2</sub> NEt                         | 129.25 | A | >99      | 7420   | 1940   | 0.26   | 34    |
| iPr <sub>2</sub> NEt                         | 129.25 | X | 95-98    | 5000   | 343    | 0.07   | 9     |
| iPr <sub>2</sub> NEt                         | 129.25 | D | 99       | 1868   | 399    | 0.21   | 28    |
| iPr <sub>2</sub> NEt                         | 129.25 | H | 99       | 150000 | 4995   | 0.03   | 4     |
| IrCl <sub>3</sub>                            | 298.58 | A |          | 2      | 306    | 152.75 | 45608 |
| IrCl <sub>3</sub>                            | 298.58 | D |          | 5      | 328    | 65.60  | 19587 |
| IrCl <sub>3</sub>                            | 298.58 | G | 99.95    | 2      | 201    | 100.50 | 30007 |
| IrCl <sub>3</sub>                            | 298.58 | H | 99.95+   | 0.1    | 30     | 300.00 | 89574 |
| IrCl <sub>3</sub>                            | 298.58 | Q | 99.95    | 5      | 340    | 68.00  | 20303 |
| Isocyanate, polymer-bound                    |        | A | 2 mmol/g | 25     | 673    | 26.92  | 13860 |
| Isocyanate, polymer-bound                    |        | Y | 2 mmol/g | 100    | 960    | 9.60   | 4900  |
| isopropenyl acetate                          | 100.12 | A | >99      | 25000  | 793    | 0.03   | 3     |
| isopropenyl acetate                          | 100.12 | D | 99       | 2293   | 230    | 0.10   | 10    |
| isopropenyl acetate                          | 100.12 | H | 99       | 100    | 15     | 0.15   | 15    |
| K <sub>2</sub> CO <sub>3</sub>               | 138.21 | A | >99      | 12000  | 709    | 0.06   | 8     |
| K <sub>2</sub> CO <sub>3</sub>               | 138.21 | D | 99       | 10000  | 190    | 0.02   | 3     |
| K <sub>2</sub> CO <sub>3</sub>               | 138.21 | G | 99+      | 2000   | 153    | 0.08   | 11    |
| K <sub>2</sub> CO <sub>3</sub>               | 138.21 | F | 99+      | 25000  | 955.32 | 0.04   | 5     |
| K <sub>2</sub> CO <sub>3</sub>               | 138.21 | H | 99       | 25000  | 280    | 0.01   | 2     |
| K <sub>2</sub> S <sub>2</sub> O <sub>8</sub> | 270.32 | A | 99       | 500    | 78     | 0.16   | 42    |
| K <sub>2</sub> S <sub>2</sub> O <sub>8</sub> | 270.32 | D | 97       | 2500   | 182    | 0.07   | 20    |
| K <sub>2</sub> S <sub>2</sub> O <sub>8</sub> | 270.33 | H | 99       | 2500   | 95     | 0.04   | 10    |
| K <sub>2</sub> S <sub>2</sub> O <sub>8</sub> | 270.32 | Q | 98+      | 25000  | 679.92 | 0.03   | 7     |

|                    |        |   |       |        |       |      |      |
|--------------------|--------|---|-------|--------|-------|------|------|
| KCl                | 74.55  | A | >99   | 500    | 58    | 0.12 | 9    |
| KCl                | 74.55  | G | 99    | 500    | 37    | 0.07 | 6    |
| KCl                | 74.55  | H | 99    | 25000  | 290   | 0.01 | 1    |
| KCl                | 74.55  | Q | >99   | 500    | 154   | 0.31 | 23   |
| KHMDS              | 199.48 | A | 0.5M  | 2L     |       |      | 544  |
| KHMDS              | 199.48 | H | 11    | 55     | 195   | 3.55 | 707  |
| KHMDS              | 199.48 | L | 1M    | 800 ML | 483   |      | 604  |
| KMnO <sub>4</sub>  | 158.03 | A | >99   | 2500   | 259   | 0.10 | 16   |
| KMnO <sub>4</sub>  | 158.03 | D | 98    | 10000  | 386   | 0.04 | 6    |
| KMnO <sub>4</sub>  | 158.04 | H | 97    | 10000  | 236   | 0.02 | 4    |
| KMnO <sub>4</sub>  | 158.03 | Q | 99+   | 500    | 65.31 | 0.13 | 21   |
| KOH                | 56.11  | A | >85   | 12000  | 456   | 0.04 | 2    |
| KOH                | 56.11  | D | 85    | 10000  | 228   | 0.02 | 1    |
| KOH                | 56.11  | H | 90    | 25000  | 158   | 0.01 | 0    |
| KPF <sub>6</sub>   | 184.06 | A | 99+   | 1000   | 315   | 0.32 | 58   |
| KPF <sub>6</sub>   | 184.07 | D | 98    | 1000   | 272   | 0.27 | 50   |
| KPF <sub>6</sub>   | 184.06 | E | 99    | 500    | 105   | 0.21 | 39   |
| KPF <sub>6</sub>   | 184.06 | F | 99    | 2500   | 630   | 0.25 | 46   |
| KPF <sub>6</sub>   | 184.07 | G | 99.5  | 500    | 135   | 0.27 | 50   |
| KPF <sub>6</sub>   | 184.07 | H | 99    | 2500   | 232   | 0.09 | 17   |
| L-Proline          | 115.13 | A | >99   | 5000   | 2335  | 0.47 | 54   |
| L-Proline          | 115.13 | D | 99    | 500    | 242   | 0.48 | 56   |
| L-Proline          | 115.13 | E | >99   | 250    | 49    | 0.20 | 23   |
| L-Proline          | 115.13 | H | 99    | 1000   | 110   | 0.11 | 13   |
| LaCl <sub>3</sub>  | 245.26 | A | 99.9  | 50     | 308   | 6.16 | 1511 |
| LaCl <sub>3</sub>  | 245.26 | D | 99.9  | 100    | 313   | 3.13 | 768  |
| LaCl <sub>3</sub>  | 245.26 | F | 99.9  | 250    | 1024  | 4.10 | 1005 |
| LaCl <sub>3</sub>  | 245.26 | G | 99.9  | 100    | 282   | 2.82 | 692  |
| LHMDS              | 167.33 | A | 97    | 250    | 330   | 1.32 | 221  |
| LHMDS              | 167.33 | A | 1M    | 18L    | 2215  |      | 123  |
| LHMDS              | 167.33 | D | 1.06M | 800mL  | 342   |      | 403  |
| LHMDS              | 167.33 | F | 1M    | 800mL  | 242   |      | 302  |
| LHMDS              | 167.33 | F | 95    | 250    | 284   | 1.14 | 190  |
| LHMDS              | 167.33 | H | 1M    | 18L    | 2495  |      | 139  |
| LiCl               | 42.39  | A | ≥99   | 500    | 183   | 0.37 | 16   |
| LiCl               | 42.39  | D | 99    | 500    | 143   | 0.29 | 12   |
| LiCl               | 42.39  | G | 99    | 250    | 44    | 0.18 | 7    |
| LiCl               | 42.39  | H | 99    | 2500   | 240   | 0.10 | 4    |
| LiNTf <sub>2</sub> | 287.09 | A | 99.95 | 100    | 357   | 3.57 | 1025 |
| LiNTf <sub>2</sub> | 287.08 | D | 98+   | 50     | 184   | 3.68 | 1056 |

|                                          |         |   |       |        |        |        |        |
|------------------------------------------|---------|---|-------|--------|--------|--------|--------|
| LiNTf <sub>2</sub>                       | 287.075 | E | 99    | 250    | 440    | 1.76   | 505    |
| LiNTf <sub>2</sub>                       | 287.075 | F | 99    | 50     | 203    | 4.06   | 1166   |
| LiNTf <sub>2</sub>                       | 287.08  | H | 95    | 100    | 129    | 1.29   | 370    |
| LuCl <sub>3</sub>                        | 281.33  | A | 99.99 | 5      | 486    | 97.20  | 27345  |
| LuCl <sub>3</sub>                        | 281.33  | D | 99.9  | 5      | 397    | 79.40  | 22338  |
| LuCl <sub>3</sub>                        | 281.33  | F | 99.9  | 5      | 336.11 | 67.22  | 18912  |
| LuCl <sub>3</sub>                        | 281.33  | G | 99.9  | 5      | 284    | 56.80  | 15980  |
| Me <sub>2</sub> S                        | 62.13   | A |       | 45000  | 2037   | 0.05   | 3      |
| Me <sub>2</sub> S                        | 62.13   | D | 99+   | 845    | 49.2   | 0.06   | 4      |
| Me <sub>2</sub> S                        | 62.13   | H | 99    | 500    | 25     | 0.05   | 3      |
| Me <sub>2</sub> Si(OEt) <sub>2</sub>     | 148.28  | A | 97    | 432.5  | 143    | 0.33   | 49     |
| Me <sub>2</sub> Si(OEt) <sub>2</sub>     | 148.28  | D | 97    | 1000   | 183    | 0.18   | 27     |
| Me <sub>2</sub> Si(OEt) <sub>2</sub>     | 148.28  | E | 97    | 432.5  | 88     | 0.20   | 30     |
| Me <sub>2</sub> Si(OEt) <sub>2</sub>     | 148.28  | F | 97    | 432.5  | 109    | 0.25   | 37     |
| Me <sub>2</sub> Si(OEt) <sub>2</sub>     | 148.28  | G | 97    | 250    | 56     | 0.22   | 33     |
| Me <sub>2</sub> Si(OEt) <sub>2</sub>     | 148.28  | H | 97    | 500    | 79     | 0.16   | 23     |
| Me <sub>2</sub> Si(OEt) <sub>2</sub>     | 148.28  | J | 95-98 | 2000   | 144    | 0.07   | 11     |
| mesitylene                               | 120.2   | A | 98    | 8640   | 960    | 0.11   | 13     |
| mesitylene                               | 120.2   | D | 98+   | 2160   | 250    | 0.12   | 14     |
| mesitylene                               | 120.2   | H | 99    | 2160   | 185    | 0.09   | 10     |
| methanol                                 | 32.04   | A |       | 158200 | 4559   | 0.03   | 1      |
| methanol                                 | 32.04   | F |       | 19775  | 266    | 0.01   | 0      |
| methanol                                 | 32.04   | H | 99.8  | 158200 | 480    | 0.00   | 0      |
| Methyl(triphenylphosphine)gold(I)        | 474.29  | A | 98    | 0.5    | 166    | 332.00 | 157464 |
| Methyl(triphenylphosphine)gold(I)        | 474.29  | G | 99    | 1      | 327    | 327.00 | 155093 |
| methyldiphenylphosphine                  | 200.21  | A | 98    | 50     | 355    | 7.10   | 1421   |
| methyldiphenylphosphine                  | 200.21  | D | 99    | 50     | 350    | 7.00   | 1401   |
| methyldiphenylphosphine                  | 200.21  | E | 99    | 5      | 52     | 10.40  | 2082   |
| methyldiphenylphosphine                  | 200.21  | G | 99    | 100    | 491    | 4.91   | 983    |
| Methyliodide                             | 141.94  | A | 99    | 25000  | 3242   | 0.13   | 18     |
| Methyliodide                             | 141.94  | D | 99    | 1000   | 204    | 0.20   | 29     |
| Methyliodide                             | 141.94  | F | 99    | 2500   | 521    | 0.21   | 30     |
| Methyliodide                             | 141.94  | H | 99    | 25000  | 2200   | 0.09   | 12     |
| methylmagnesium bromide (3.0 M in ether) | 119.26  | A |       | 18 L   | 1510   |        | 28     |
| methylmagnesium bromide (3.0 M in ether) | 119.26  | D |       | 500 mL | 138    |        | 92     |
| methylmagnesium bromide (3.0 M in ether) | 119.26  | H |       | 800 mL | 140    |        | 58     |
| Methyltriphenylphosphonium bromide       | 357.22  | A | 98    | 500    | 216    | 0.43   | 154    |
| Methyltriphenylphosphonium bromide       | 357.24  | D | 98+   | 1000   | 362    | 0.36   | 129    |
| Methyltriphenylphosphonium bromide       | 357.23  | E |       | 500    | 108    | 0.22   | 77     |



|                                         |        |   |       |       |        |       |       |
|-----------------------------------------|--------|---|-------|-------|--------|-------|-------|
| Methyltriphenylphosphonium bromide      | 357.23 | F | 98    | 2500  | 740    | 0.30  | 106   |
| Methyltriphenylphosphonium bromide      | 357.23 | G | 98+   | 250   | 141    | 0.56  | 201   |
| Methyltriphenylphosphonium bromide      | 357.24 | H | 98    | 500   | 90     | 0.18  | 64    |
| Mg                                      | 24.31  | A | 98    | 2500  | 244    | 0.10  | 2     |
| Mg                                      | 24.31  | G | 99+   | 1000  | 103    | 0.10  | 3     |
| Mg                                      | 24.31  | Z |       | 2500  | 215    | 0.09  | 2     |
| Mg                                      | 24.31  | H | 99    | 2500  | 92     | 0.04  | 1     |
| MgCl <sub>2</sub>                       | 95.21  | A | ≥98   | 1000  | 58     | 0.06  | 6     |
| MgCl <sub>2</sub>                       | 95.22  | D | 99    | 1000  | 35     | 0.04  | 3     |
| MgCl <sub>2</sub>                       | 95.22  | G | 97.5  | 1000  | 46     | 0.05  | 4     |
| MgCl <sub>2</sub>                       | 95.21  | H | 98    | 100   | 20     | 0.20  | 19    |
| Mn(OAc) <sub>2</sub>                    | 173.03 | A | 98    | 100   | 251    | 2.51  | 433   |
| Mn(OAc) <sub>2</sub>                    | 173.03 | D | >98   | 1000  | 451    | 0.45  | 78    |
| Mn(OAc) <sub>2</sub>                    | 173.03 | Q | 99    | 500   | 191    | 0.38  | 66    |
| Mn(OAc) <sub>2</sub> .4H <sub>2</sub> O | 245.09 | A | >99   | 2000  | 133    | 0.07  | 16    |
| Mn(OAc) <sub>2</sub> .4H <sub>2</sub> O | 245.09 | D |       | 2000  | 93.3   | 0.05  | 11    |
| Mn(OAc) <sub>2</sub> .4H <sub>2</sub> O | 245.08 | G | >99   | 1000  | 70     | 0.07  | 17    |
| Mn(OAc) <sub>2</sub> .4H <sub>2</sub> O | 245.09 | G | 99+   | 1000  | 70     | 0.07  | 17    |
| Mn(OAc) <sub>2</sub> .4H <sub>2</sub> O | 245.09 | H | 99    | 100   | 60     | 0.60  | 147   |
| Mn(OAc) <sub>2</sub> .4H <sub>2</sub> O | 245.09 | Q | 99+   | 2500  | 156.51 | 0.06  | 15    |
| Mn(OAc) <sub>3</sub> .2H <sub>2</sub> O | 268.1  | A | 97    | 100   | 424    | 4.24  | 1137  |
| Mn(OAc) <sub>3</sub> .2H <sub>2</sub> O | 268.1  | D | 97    | 10    | 375    | 37.50 | 10054 |
| Mn(OAc) <sub>3</sub> .2H <sub>2</sub> O | 268.1  | G | 98    | 25    | 130    | 5.20  | 1394  |
| Mn(OAc) <sub>3</sub> .2H <sub>2</sub> O | 268.1  | H | 97    | 25    | 60     | 2.40  | 643   |
| Mn(OAc) <sub>3</sub> .2H <sub>2</sub> O | 268.1  | Q | 97    | 100   | 403    | 4.03  | 1080  |
| MnCl <sub>2</sub>                       | 125.84 | A | 98    | 2000  | 73     | 0.04  | 5     |
| MnCl <sub>2</sub>                       | 125.84 | D | 97    | 10000 | 236    | 0.02  | 3     |
| MnCl <sub>2</sub>                       | 125.84 | G | 97    | 2000  | 59     | 0.03  | 4     |
| MnCl <sub>2</sub>                       | 125.84 | H | 98    | 25    | 30     | 1.20  | 151   |
| MnCl <sub>2</sub>                       | 125.84 | Q | 97    | 2500  | 84     | 0.03  | 4     |
| MnCO <sub>3</sub>                       | 114.95 | A |       | 1000  | 109    | 0.11  | 13    |
| MnCO <sub>3</sub>                       | 114.95 | D |       | 2000  | 106    | 0.05  | 6     |
| MnCO <sub>3</sub>                       | 114.95 | G | 90    | 500   | 65     | 0.13  | 15    |
| MnO                                     | 70.94  | A | 99    | 500   | 47     | 0.09  | 7     |
| MnO                                     | 70.94  | D | 99    | 10000 | 364    | 0.04  | 3     |
| MnO                                     | 70.94  | G | 99    | 2000  | 126    | 0.06  | 4     |
| MnO                                     | 70.94  | Q | 99.99 | 10    | 117.4  | 11.74 | 833   |
| MnO <sub>2</sub>                        | 86.94  | A | >99   | 500   | 147    | 0.29  | 26    |
| MnO <sub>2</sub>                        | 86.94  | D | 90    | 500   | 82     | 0.16  | 14    |
| MnO <sub>2</sub>                        | 86.94  | G |       | 250   | 93     | 0.37  | 32    |

|                                               |        |   |       |        |        |       |      |
|-----------------------------------------------|--------|---|-------|--------|--------|-------|------|
| MnO <sub>2</sub>                              | 86.94  | Q | 90    | 500    | 82     | 0.16  | 14   |
| MnO <sub>2</sub> (reagent plus)               | 86.94  | A | >99   | 500    | 151    | 0.30  | 26   |
| MnO <sub>2</sub> (reagent plus)               | 86.94  | D | 98    | 10000  | 384    | 0.04  | 3    |
| MnO <sub>2</sub> (reagent plus)               | 86.94  | G | 99+   | 500    | 192    | 0.38  | 33   |
| MnO <sub>2</sub> (reagent plus)               | 86.94  | Q | 99    | 2500   | 443.41 | 0.18  | 15   |
| MnO <sub>2</sub> (tech, activated)            | 86.94  | A | 85    | 12000  | 600    | 0.05  | 4    |
| MnO <sub>2</sub> (tech, activated)            | 86.94  | D | 90    | 500    | 81.8   | 0.16  | 14   |
| MnO <sub>2</sub> (tech, activated)            | 86.94  | G |       | 250    | 93     | 0.37  | 32   |
| MnO <sub>2</sub> (tech, activated)            | 86.94  | Q | 80-85 | 2500   | 147.8  | 0.06  | 5    |
| MnO <sub>2</sub> (technical)                  | 86.94  | H | >85   | 1000   | 130    | 0.13  | 11   |
| MoCl <sub>3</sub>                             | 202.3  | A | 99.95 | 2      | 70     | 34.95 | 7070 |
| MoCl <sub>3</sub>                             | 202.3  | D | 99.5  | 10     | 171    | 17.10 | 3459 |
| MoCl <sub>3</sub>                             | 202.3  | G | 99.5  | 25     | 308    | 12.32 | 2492 |
| MoCl <sub>3</sub>                             | 202.3  | Q | 99.5  | 10     | 173    | 17.30 | 3500 |
| MoCl <sub>5</sub>                             | 273.21 | A | 95    | 100    | 184    | 1.84  | 501  |
| MoCl <sub>5</sub>                             | 273.21 | D | 99.6  | 1000   | 1442   | 1.44  | 394  |
| MoCl <sub>5</sub>                             | 273.21 | G | 99.6  | 1000   | 1372   | 1.37  | 375  |
| MoCl <sub>5</sub>                             | 273.21 | Q | 99.6  | 1000   | 1471   | 1.47  | 402  |
| n-butanol                                     | 74.12  | A | >99.9 | 20000  | 400    | 0.02  | 1    |
| n-butanol                                     | 74.12  | D | 99.4+ | 12960  | 288    | 0.02  | 2    |
| n-butanol                                     | 74.12  | F | 99.5  | 8100   | 308    | 0.04  | 3    |
| n-butanol                                     | 74.12  | H | 99.4+ | 162000 | 1495   | 0.01  | 1    |
| Na                                            | 22.99  | A |       | 1000   | 190    | 0.19  | 4    |
| Na                                            | 22.99  | D | 99    | 2500   | 244    | 0.10  | 2    |
| Na                                            | 22.99  | G | 99+   | 2500   | 656    | 0.26  | 6    |
| Na <sub>2</sub> S <sub>2</sub> O <sub>8</sub> | 238.1  | A | 98    | 2500   | 98     | 0.04  | 9    |
| Na <sub>2</sub> S <sub>2</sub> O <sub>8</sub> | 238.1  | D | 98    | 5000   | 102    | 0.02  | 5    |
| Na <sub>2</sub> S <sub>2</sub> O <sub>8</sub> | 238.1  | Q | 98+   | 5000   | 169.62 | 0.03  | 8    |
| NaBF <sub>4</sub>                             | 109.79 | A | 98    | 10000  | 377    | 0.04  | 4    |
| NaBF <sub>4</sub>                             | 109.79 | D | 97    | 2000   | 143    | 0.07  | 8    |
| NaBF <sub>4</sub>                             | 109.79 | E | 98    | 500    | 42     | 0.08  | 9    |
| NaBF <sub>4</sub>                             | 109.79 | F | 98    | 2500   | 225    | 0.09  | 10   |
| NaBF <sub>4</sub>                             | 109.79 | G | 98    | 2000   | 180    | 0.09  | 10   |
| NaBF <sub>4</sub>                             | 109.79 | H | 98    | 2500   | 155    | 0.06  | 7    |
| NaCl                                          | 58.44  | A | ≥99   | 500    | 42     | 0.08  | 5    |
| NaCl                                          | 58.44  | G | 99    | 1000   | 28     | 0.03  | 2    |
| NaCl                                          | 58.44  | H | 99    | 50000  | 295    | 0.01  | 0    |
| NaCl                                          | 58.44  | Q | ≥99   | 500    | 62     | 0.12  | 7    |
| NaH (60)                                      | 24     | A | 60    | 1200   | 245.5  | 0.20  | 5    |
| NaH (60)                                      | 24     | D | 60    | 1200   | 422    | 0.35  | 8    |

|                                                    |        |   |        |       |       |       |       |
|----------------------------------------------------|--------|---|--------|-------|-------|-------|-------|
| NaH (60)                                           | 24     | H | 60     | 6000  | 1720  | 0.29  | 7     |
| NaH <sub>2</sub> PO <sub>2</sub>                   | 87.98  | A | 98     | 1000  | 133   | 0.13  | 12    |
| NaH <sub>2</sub> PO <sub>2</sub> •H <sub>2</sub> O | 105.99 | A | 99     | 500   | 79    | 0.16  | 17    |
| NaH <sub>2</sub> PO <sub>2</sub> •H <sub>2</sub> O | 105.99 | D |        | 1000  | 70    | 0.07  | 7     |
| NaOH                                               | 40     | A | >97    | 50000 | 1025  | 0.02  | 1     |
| NaOH                                               | 40     | D | 97     | 25000 | 443   | 0.02  | 1     |
| NaOH                                               | 40     | H | 98+    | 25000 | 95    | 0.00  | 0     |
| NbCl <sub>5</sub>                                  | 270.17 | A | 99     | 50    | 140   | 2.79  | 754   |
| NbCl <sub>5</sub>                                  | 270.17 | D | 99     | 500   | 683   | 1.37  | 369   |
| NbCl <sub>5</sub>                                  | 270.17 | G | >99    | 250   | 194   | 0.78  | 210   |
| NbCl <sub>5</sub>                                  | 270.17 | H | 99.99  | 1     | 30    | 30.00 | 8105  |
| NbCl <sub>5</sub>                                  | 270.17 | Q | 99.99  | 25    | 109   | 4.37  | 1180  |
| NCS                                                | 133.53 | A | 98     | 500   | 80.9  | 0.16  | 22    |
| NCS                                                | 133.53 | D | 98     | 1000  | 134   | 0.13  | 18    |
| NCS                                                | 133.53 | H | 98     | 1000  | 54    | 0.05  | 7     |
| NdCl <sub>3</sub>                                  | 250.6  | A | >99.99 | 25    | 854   | 34.16 | 8560  |
| NdCl <sub>3</sub>                                  | 250.6  | D | 99.9   | 100   | 405   | 4.05  | 1015  |
| NdCl <sub>3</sub>                                  | 250.6  | F | 99.9   | 5     | 61.32 | 12.26 | 3073  |
| NdCl <sub>3</sub>                                  | 250.6  | G | 99.9   | 50    | 304   | 6.08  | 1524  |
| Ni on silica                                       | 90.33  | A |        | 100   | 70    | 0.70  | 63    |
| Ni on silica                                       | 90.33  | D |        | 100   | 79    | 0.79  | 71    |
| Ni on silica                                       | 90.33  | G |        | 250   | 156   | 0.62  | 56    |
| Ni(acac) <sub>2</sub>                              | 256.91 | A | 95     | 50    | 198   | 3.96  | 1017  |
| Ni(acac) <sub>2</sub>                              | 256.91 | D | 95     | 500   | 290   | 0.58  | 149   |
| Ni(acac) <sub>2</sub>                              | 256.91 | G | 95     | 100   | 198   | 1.98  | 509   |
| Ni(acac) <sub>2</sub>                              | 256.91 | Q | 98     | 10    | 344   | 34.44 | 8847  |
| Ni(COD) <sub>2</sub>                               | 275.06 | A |        | 2     | 73    | 36.40 | 10012 |
| Ni(COD) <sub>2</sub>                               | 275.06 | D | 96     | 10    | 324   | 32.40 | 8912  |
| Ni(COD) <sub>2</sub>                               | 275.06 | G | 98     | 10    | 268   | 26.80 | 7372  |
| Ni(COD) <sub>2</sub>                               | 275.06 | Q | 98     | 10    | 344   | 34.44 | 9473  |
| Ni(Oac) <sub>2</sub> •4H <sub>2</sub> O            | 248.84 | A | 98     | 500   | 68    | 0.14  | 34    |
| Ni(Oac) <sub>2</sub> •4H <sub>2</sub> O            | 248.84 | F | 99+    | 2500  | 187   | 0.07  | 19    |
| Ni(Oac) <sub>2</sub> •4H <sub>2</sub> O            | 248.86 | G | 98+    | 1000  | 172   | 0.17  | 43    |
| Ni(Oac) <sub>2</sub> •4H <sub>2</sub> O            | 248.86 | H | 98     | 2500  | 170   | 0.07  | 17    |
| Ni(Oac) <sub>2</sub> •4H <sub>2</sub> O            | 248.86 | J | 99     | 2000  | 162   | 0.08  | 20    |
| NiCl <sub>2</sub>                                  | 129.6  | A | 98     | 250   | 167   | 0.67  | 86    |
| NiCl <sub>2</sub>                                  | 129.6  | D | 98     | 500   | 270   | 0.54  | 70    |
| NiCl <sub>2</sub>                                  | 129.6  | G | 98     | 250   | 192   | 0.77  | 100   |
| NiCl <sub>2</sub>                                  | 129.6  | H | 98     | 25    | 25    | 1.00  | 130   |
| NiCl <sub>2</sub>                                  | 129.6  | Q | 98     | 500   | 270   | 0.54  | 70    |

|                                                    |        |    |       |       |       |        |        |
|----------------------------------------------------|--------|----|-------|-------|-------|--------|--------|
| NiCl <sub>2</sub> (PPh <sub>3</sub> ) <sub>2</sub> | 654.17 | A  |       | 50    | 144   | 2.87   | 1877   |
| NiCl <sub>2</sub> (PPh <sub>3</sub> ) <sub>2</sub> | 654.18 | D  | 98    | 50    | 126   | 2.52   | 1649   |
| NiCl <sub>2</sub> (PPh <sub>3</sub> ) <sub>2</sub> | 656.19 | E  |       | 100   | 192   | 1.92   | 1260   |
| NiCl <sub>2</sub> (PPh <sub>3</sub> ) <sub>2</sub> | 656.19 | F  |       | 50    | 118   | 2.36   | 1548   |
| NiCl <sub>2</sub> (PPh <sub>3</sub> ) <sub>2</sub> | 654.2  | G  | 99    | 25    | 66    | 2.64   | 1727   |
| NiCl <sub>2</sub> •6H <sub>2</sub> O               | 237.71 | A  | 99    | 500   | 109   | 0.22   | 52     |
| NiCl <sub>2</sub> •6H <sub>2</sub> O               | 237.71 | D  | 99.3  | 2000  | 144   | 0.07   | 17     |
| NiCl <sub>2</sub> •6H <sub>2</sub> O               | 237.71 | D  | 98    | 5000  | 368   | 0.07   | 17     |
| Nixantphos                                         | 551.55 | A  | 98    | 1     | 145.5 | 145.50 | 80251  |
| Nixantphos                                         | 551.55 | A  | 97    | 1     | 146   | 145.50 | 80251  |
| Nixantphos                                         | 551.55 | AA | 98    | 10    | 475   | 47.50  | 26199  |
| Nixantphos                                         | 551.55 | D  | 98    | 5     | 484   | 96.80  | 53390  |
| Nixantphos                                         | 551.55 | G  | 98    | 2     | 237   | 118.50 | 65359  |
| Nixantphos                                         | 551.55 | K  | 98    | 25    | 2025  | 81.00  | 44676  |
| Nixantphos                                         | 551.55 | P  | 98    | 5     | 373   | 74.60  | 41146  |
| Nixantphos                                         | 551.55 | U  | 98    | 5     | 459   | 91.80  | 50632  |
| OsCl <sub>3</sub>                                  | 296.59 | A  | 99.9  | 0.5   | 312   | 624.00 | 185072 |
| OsCl <sub>3</sub>                                  | 296.59 | G  | 99.95 | 5     | 750   | 150.00 | 44489  |
| OsCl <sub>3</sub> .3H <sub>2</sub> O               | 350.6  | D  | 99.99 | 5     | 685   | 137.00 | 48032  |
| OsCl <sub>3</sub> .3H <sub>2</sub> O               | 350.6  | Q  | 99.99 | 5     | 685   | 137.00 | 48032  |
| OsO <sub>4</sub>                                   | 254.23 | A  | 99.8  | 1     | 319   | 319.00 | 81099  |
| OsO <sub>4</sub>                                   | 254.23 | D  | 99.8  | 10    | 1238  | 123.80 | 31474  |
| OsO <sub>4</sub>                                   | 254.23 | G  | 99.95 | 5     | 458   | 91.60  | 23287  |
| OsO <sub>4</sub>                                   | 254.23 | H  |       | 10    | 750   | 75.00  | 19067  |
| OsO <sub>4</sub>                                   | 254.23 | Q  | 99.8  | 10    | 1263  | 126.30 | 32109  |
| Oxalic acid-dihydrate                              | 126.07 | A  |       | 25000 | 246   | 0.01   | 1      |
| Oxalic acid-dihydrate                              | 126.07 | H  | 99    | 10000 | 395   | 0.04   | 5      |
| P (red)                                            | 30.97  | A  | 97    | 1000  | 119   | 0.12   | 4      |
| P (red)                                            | 30.97  | D  | 98.9  | 2000  | 621   | 0.31   | 10     |
| p-benzoquinone                                     | 108.1  | H  | 99    | 500   | 54    | 0.11   | 12     |
| p-toluenesulfonyl chloride                         | 190.65 | A  | >98   | 3000  | 165   | 0.06   | 10     |
| p-toluenesulfonyl chloride                         | 190.65 | D  | 98    | 5000  | 230   | 0.05   | 9      |
| p-toluenesulfonyl chloride                         | 190.65 | H  | 99    | 10000 | 395   | 0.04   | 8      |
| P(OEt) <sub>3</sub>                                | 166.16 | A  | 98    | 3876  | 150.5 | 0.04   | 6      |
| P(OEt) <sub>3</sub>                                | 166.16 | D  | 98    | 479   | 35.3  | 0.07   | 12     |
| P(OEt) <sub>3</sub>                                | 166.16 | G  | 97    | 1000  | 80    | 0.08   | 13     |
| P(OEt) <sub>3</sub>                                | 166.16 | H  | 99    | 500   | 30    | 0.06   | 10     |
| P(OMe) <sub>3</sub>                                | 124.08 | A  | >97   | 1052  | 84.9  | 0.08   | 10     |
| P(OMe) <sub>3</sub>                                | 124.08 | D  | 97    | 2500  | 550   | 0.22   | 27     |
| P(OMe) <sub>3</sub>                                | 124.08 | G  | 97    | 1000  | 123   | 0.12   | 15     |

|                                   |        |     |      |       |      |       |       |
|-----------------------------------|--------|-----|------|-------|------|-------|-------|
| P(OMe) <sub>3</sub>               | 124.08 | H   | 99   | 4208  | 265  | 0.06  | 8     |
| P <sub>2</sub> O <sub>5</sub>     | 141.94 | A   | 99.9 | 6000  | 495  | 0.08  | 12    |
| P <sub>2</sub> O <sub>5</sub>     | 141.94 | D   | 98   | 2500  | 76   | 0.03  | 4     |
| paraformaldehyde                  | 30.03  | A   | 95   | 3000  | 238  | 0.08  | 2     |
| paraformaldehyde                  | 30.03  | D   | 97   | 10000 | 212  | 0.02  | 1     |
| paraformaldehyde                  | 30.03  | H   | 95   | 3000  | 60   | 0.02  | 1     |
| Pb(NO <sub>3</sub> ) <sub>2</sub> | 331.21 | A   | 99   | 2500  | 285  | 0.11  | 38    |
| Pb(NO <sub>3</sub> ) <sub>2</sub> | 331.21 | D   | 99   | 2500  | 162  | 0.06  | 21    |
| Pb(NO <sub>3</sub> ) <sub>2</sub> | 331.21 | G   | 99   | 1000  | 108  | 0.11  | 36    |
| Pb(OAc) <sub>4</sub>              | 443.38 | A   | 95   | 500   | 297  | 0.59  | 263   |
| Pb(OAc) <sub>4</sub>              | 443.38 | D   | 96   | 1000  | 297  | 0.30  | 132   |
| Pb(OAc) <sub>4</sub>              | 443.38 | G   | 95   | 250   | 228  | 0.91  | 404   |
| PbCl <sub>2</sub>                 | 278.11 | A   | 98   | 1000  | 207  | 0.21  | 57    |
| PbCl <sub>2</sub>                 | 278.11 | D   | 99   | 2000  | 181  | 0.09  | 25    |
| PbCl <sub>2</sub>                 | 278.11 | E   |      | 25    | 210  | 8.40  | 2336  |
| PbCl <sub>2</sub>                 | 278.11 | G   | 99   | 500   | 116  | 0.23  | 65    |
| PBr <sub>3</sub>                  | 270.7  | A   | 97   | 500   | 143  | 0.29  | 77    |
| PBr <sub>3</sub>                  | 270.7  | D   | 99   | 100   | 67   | 0.67  | 180   |
| PBr <sub>3</sub>                  | 270.7  | GFS | 99   | 4000  | 698  | 0.17  | 47    |
| PBr <sub>3</sub>                  | 270.7  | H   | 99   | 2500  | 365  | 0.15  | 40    |
| PbSO <sub>4</sub>                 | 303.26 | A   | 98   | 500   | 103  | 0.21  | 62    |
| PbSO <sub>4</sub>                 | 303.26 | D   |      | 2500  | 511  | 0.20  | 62    |
| PbSO <sub>4</sub>                 | 303.26 | G   | 99   | 1000  | 266  | 0.27  | 81    |
| PCl <sub>3</sub>                  | 137.33 | A   | 99   | 1000  | 122  | 0.12  | 17    |
| PCl <sub>3</sub>                  | 137.33 | D   | 98   | 250   | 61   | 0.24  | 33    |
| PCl <sub>3</sub>                  | 137.33 | G   | 98   | 250   | 58   | 0.23  | 32    |
| PCl <sub>3</sub>                  | 137.33 | H   | 98   | 500   | 95   | 0.19  | 26    |
| PCl <sub>5</sub>                  | 208.24 | A   | 95   | 1000  | 88   | 0.09  | 18    |
| PCl <sub>5</sub>                  | 208.24 | A   | 98   | 1000  | 111  | 0.11  | 23    |
| PCl <sub>5</sub>                  | 208.24 | D   | 98   | 2000  | 125  | 0.06  | 13    |
| PCl <sub>5</sub>                  | 208.24 | G   | 98   | 1000  | 132  | 0.13  | 27    |
| PCl <sub>5</sub>                  | 208.24 | H   | 95   | 100   | 24   | 0.24  | 50    |
| Pd(acac) <sub>2</sub>             | 304.62 | A   | 99   | 5     | 296  | 59.20 | 18034 |
| Pd(acac) <sub>2</sub>             | 304.62 | D   |      | 5     | 291  | 58.20 | 17729 |
| Pd(acac) <sub>2</sub>             | 304.62 | E   | >98  | 5     | 292  | 58.40 | 17790 |
| Pd(acac) <sub>2</sub>             | 304.62 | G   | 99   | 5     | 216  | 43.20 | 13160 |
| Pd(acac) <sub>2</sub>             | 304.62 | H   | 98   | 5     | 178  | 35.60 | 10844 |
| Pd(OAc) <sub>2</sub>              | 224.51 | A   | 98   | 100   | 2555 | 25.55 | 5736  |
| Pd(OAc) <sub>2</sub>              | 224.51 | D   | 98   | 25    | 862  | 34.48 | 7741  |

|                                                    |         |   |       |       |       |       |       |
|----------------------------------------------------|---------|---|-------|-------|-------|-------|-------|
| Pd(OAc) <sub>2</sub>                               | 224.51  | G | >99   | 25    | 834   | 33.36 | 7490  |
| Pd(OAc) <sub>2</sub>                               | 224.51  | H | 99    | 25    | 995   | 39.80 | 8935  |
| Pd(OAc) <sub>2</sub>                               | 224.51  | Q |       | 50    | 1919  | 38.38 | 8617  |
| Pd(PPh <sub>3</sub> ) <sub>2</sub> Cl <sub>2</sub> | 701.9   | H | 96    | 25    | 210   | 8.40  | 5896  |
| Pd(PPh <sub>3</sub> ) <sub>4</sub>                 | 1155.56 | A | 99    | 25    | 461   | 18.42 | 21285 |
| Pd(PPh <sub>3</sub> ) <sub>4</sub>                 | 1155.56 | D | 99.8  | 10    | 241   | 24.10 | 27849 |
| Pd(PPh <sub>3</sub> ) <sub>4</sub>                 | 1155.56 | G | 99    | 25    | 420   | 16.80 | 19413 |
| Pd(PPh <sub>3</sub> ) <sub>4</sub>                 | 1155.56 | H | 98    | 25    | 195   | 7.80  | 9013  |
| Pd(PPh <sub>3</sub> ) <sub>4</sub>                 | 1155.56 | Q | 99    | 100   | 1288  | 12.88 | 14883 |
| Pd <sub>2</sub> dba <sub>3</sub>                   | 915.72  | A | 97    | 500   | 7450  | 14.90 | 6822  |
| Pd <sub>2</sub> dba <sub>3</sub>                   | 915.72  | A | 97    | 500   | 7450  | 14.90 | 13644 |
| Pd <sub>2</sub> dba <sub>3</sub>                   | 915.72  | D |       | 5     | 202   | 40.40 | 36995 |
| Pd <sub>2</sub> dba <sub>3</sub>                   | 915.72  | F | 97    | 25    | 715   | 28.60 | 26190 |
| Pd <sub>2</sub> dba <sub>3</sub>                   | 915.72  | G |       | 25    | 730   | 29.20 | 26739 |
| Pd <sub>2</sub> dba <sub>3</sub>                   | 915.72  | H | 97    | 25    | 400   | 16.00 | 14652 |
| PdCl <sub>2</sub>                                  | 177.33  | A | 99    | 100   | 2520  | 25.20 | 4469  |
| PdCl <sub>2</sub>                                  | 177.33  | D | 99.9  | 50    | 2047  | 40.94 | 7260  |
| PdCl <sub>2</sub>                                  | 177.33  | G | 99.9  | 25    | 788   | 31.52 | 5589  |
| PdCl <sub>2</sub>                                  | 177.33  | H | 98    | 5     | 190   | 38.00 | 6739  |
| PdCl <sub>2</sub>                                  | 177.33  | Q | 59Pd  | 100   | 2771  | 27.71 | 4914  |
| PdCl <sub>2</sub> (PPh <sub>3</sub> ) <sub>2</sub> | 701.9   | A | 98    | 100   | 1430  | 14.30 | 10037 |
| PdCl <sub>2</sub> (PPh <sub>3</sub> ) <sub>2</sub> | 701.9   | D | 99.95 | 25    | 454   | 18.16 | 12747 |
| PdCl <sub>2</sub> (PPh <sub>3</sub> ) <sub>2</sub> | 701.9   | G | 99    | 25    | 382   | 15.28 | 10725 |
| PdCl <sub>2</sub> (PPh <sub>3</sub> ) <sub>2</sub> | 701.9   | H | 96    | 25    | 210   | 8.40  | 5896  |
| Ph <sub>2</sub> P(H)BH <sub>3</sub>                | 200.02  | A |       | 5     | 259   | 51.70 | 10341 |
| Ph <sub>2</sub> P(O)H                              | 202.2   | A | 97    | 5     | 184   | 36.70 | 7421  |
| Ph <sub>2</sub> P(O)H                              | 202.2   | D | 97    | 25    | 570   | 22.80 | 4610  |
| Ph <sub>2</sub> P(O)H                              | 202.2   | E | 97    | 25    | 430   | 17.20 | 3478  |
| Ph <sub>2</sub> P(O)H                              | 202.2   | F | 97    | 5     | 143   | 28.68 | 5798  |
| Ph <sub>2</sub> P(O)H                              | 202.2   | I | 98    | 500   | 435   | 0.87  | 176   |
| Ph <sub>2</sub> P(O)H                              | 202.2   | L | 97    | 25    | 463   | 18.53 | 3746  |
| Ph <sub>2</sub> P(O)H                              | 202.2   | R | 97    | 1000  | 693   | 0.69  | 140   |
| Ph <sub>2</sub> P(O)H                              | 202.2   | V | 98    | 1000  | 644   | 0.64  | 130   |
| Ph <sub>2</sub> PCI                                | 220.63  | A | 96    | 500   | 306.5 | 0.61  | 135   |
| Ph <sub>2</sub> PCI                                | 220.63  | D | 95    | 500   | 280   | 0.56  | 124   |
| Ph <sub>2</sub> PCI                                | 220.63  | G | 98    | 500   | 295   | 0.59  | 130   |
| Ph <sub>2</sub> PCI                                | 220.63  | G | 95    | 1000  | 504   | 0.50  | 111   |
| Ph <sub>2</sub> PCI                                | 220.63  | H | 95    | 500   | 180   | 0.36  | 79    |
| Ph <sub>3</sub> P                                  | 262.29  | A | 99    | 10000 | 844   | 0.08  | 22    |
| Ph <sub>3</sub> P                                  | 262.29  | D | 99+   | 500   | 116   | 0.23  | 61    |

|                            |        |   |     |        |       |       |       |
|----------------------------|--------|---|-----|--------|-------|-------|-------|
| Ph <sub>3</sub> P          | 262.29 | F | 99  | 5000   | 431.5 | 0.09  | 23    |
| Ph <sub>3</sub> P          | 262.29 | G | 99  | 2000   | 214   | 0.11  | 28    |
| phenyl furan-2-carboxylate | 188.18 | U |     | 5      | 307   | 61.40 | 11554 |
| PhI(OAc) <sub>2</sub>      | 322.1  | A | 98  | 100    | 145   | 1.45  | 465   |
| PhI(OAc) <sub>2</sub>      | 322.1  | D | 98  | 500    | 571   | 1.14  | 368   |
| PhI(OAc) <sub>2</sub>      | 322.1  | E | 97  | 250    | 264   | 1.06  | 340   |
| PhMgBr                     | 181.31 | A |     |        |       |       | 111   |
| PhMgBr                     | 181.31 | H |     |        |       |       | 150   |
| PhP(O)(OH)H                | 142.09 | A | 99  | 500    | 90.9  | 0.18  | 26    |
| PhP(O)(OH)H                | 142.09 | D | 98  | 500    | 84.6  | 0.17  | 24    |
| PhP(O)(OH)H                | 142.09 | G | 99  | 500    | 77    | 0.15  | 22    |
| PhP(O)(OH)H                | 142.09 | H | 98  | 100    | 22    | 0.22  | 31    |
| PhPCl <sub>2</sub>         | 178.99 | A | 97  | 500    | 140   | 0.28  | 50    |
| PhPCl <sub>2</sub>         | 178.99 | D | 97  | 1000   | 156   | 0.16  | 28    |
| PhPCl <sub>2</sub>         | 178.99 | G | 97  | 1000   | 147   | 0.15  | 26    |
| PhPCl <sub>2</sub>         | 178.99 | H | 97  | 1000   | 179   | 0.18  | 32    |
| picoline borane            | 109.96 | A | 95  | 5      | 58    | 11.66 | 1282  |
| picoline borane            | 109.96 | D | 95  | 25     | 249   | 9.96  | 1095  |
| picoline borane            | 109.96 | E | >85 | 5      | 90    | 18.00 | 1979  |
| pinacol                    | 118.18 | A | 98  | 500    | 388.5 | 0.78  | 92    |
| pinacol                    | 118.18 | D | 99  | 500    | 379   | 0.76  | 90    |
| pinacol                    | 118.18 | E | 60  | 500    | 120   | 0.24  | 28    |
| pinacol                    | 118.18 | H | 99  | 500    | 100   | 0.20  | 24    |
| pinacol-H-phosphonate      | 164.14 | A | 95  | 1      | 78.4  | 78.40 | 12869 |
| pinacol-H-phosphonate      | 164.14 | E | >95 | 5      | 248   | 49.60 | 8141  |
| Pivaloyl chloride          | 120.58 | A | 99  | 489.5  | 61    | 0.12  | 15    |
| Pivaloyl chloride          | 120.58 | D | 98+ | 2447.5 | 197   | 0.08  | 10    |
| Pivaloyl chloride          | 120.58 | F | 99  | 1000   | 92    | 0.09  | 11    |
| Pivaloyl chloride          | 120.58 | H | 98  | 18000  | 1250  | 0.07  | 8     |
| POCl <sub>3</sub>          | 153.33 | A | 99  | 1000   | 96    | 0.10  | 15    |
| POCl <sub>3</sub>          | 153.33 | D | 99  | 1000   | 93    | 0.09  | 14    |
| POCl <sub>3</sub>          | 153.33 | G | 98  | 1000   | 158   | 0.16  | 24    |
| POCl <sub>3</sub>          | 153.33 | H | 99  | 4000   | 250   | 0.06  | 10    |
| potassium tert-butoxide    | 112.22 | A | 98+ | 25000  | 2831  | 0.11  | 13    |
| potassium tert-butoxide    | 112.22 | D | 97  | 1000   | 173   | 0.17  | 19    |
| potassium tert-butoxide    | 112.22 | H | 99  | 20000  | 1300  | 0.07  | 7     |
| PPh <sub>3</sub>           | 262.29 | A | 99  | 10000  | 844   | 0.08  | 22    |
| PPh <sub>3</sub>           | 262.29 | D | 99  | 1000   | 210   | 0.21  | 55    |
| PPh <sub>3</sub>           | 262.29 | E | 95  | 500    | 82    | 0.16  | 43    |

|                                    |        |   |       |        |      |        |        |
|------------------------------------|--------|---|-------|--------|------|--------|--------|
| PPh <sub>3</sub>                   | 262.29 | G | 99    | 2000   | 214  | 0.11   | 28     |
| PPh <sub>3</sub>                   | 262.29 | H | 99    | 10000  | 350  | 0.04   | 9      |
| PrCl <sub>3</sub>                  | 247.27 | A | 99.99 | 5      | 168  | 33.60  | 8308   |
| PrCl <sub>3</sub>                  | 247.27 | D | 99.99 | 25     | 442  | 17.68  | 4372   |
| PrCl <sub>3</sub>                  | 247.27 | G | 99.9  | 25     | 138  | 5.52   | 1365   |
| PtCl <sub>2</sub>                  | 265.98 | A | 98    | 5      | 637  | 127.40 | 33886  |
| PtCl <sub>2</sub>                  | 265.98 | D | 98    | 5      | 586  | 117.20 | 31173  |
| PtCl <sub>2</sub>                  | 265.98 | G | 99.9  | 5      | 760  | 152.00 | 40429  |
| PtCl <sub>2</sub>                  | 265.98 | H | 95+   | 25     | 1295 | 51.80  | 13778  |
| PtCl <sub>2</sub>                  | 265.98 | Q | 99    | 25     | 2016 | 80.63  | 21446  |
| PtCl <sub>4</sub>                  | 336.89 | A | 96    | 5      | 517  | 103.40 | 34834  |
| PtCl <sub>4</sub>                  | 336.89 | D | 99.9  | 5      | 608  | 121.60 | 40966  |
| PtCl <sub>4</sub>                  | 336.89 | G | 99.9  | 5      | 480  | 96.00  | 32341  |
| PtCl <sub>4</sub>                  | 336.89 | Q | 99    | 5      | 444  | 88.84  | 29928  |
| pyridine                           | 79.1   | H | 60    | 200000 | 6495 | 0.03   | 3      |
| pyridine                           | 79.1   | H | 60    | 200000 | 6495 | 0.03   | 3      |
| rac-BINAP                          | 622.67 | A | 96    | 1      | 84   | 84.10  | 52367  |
| rac-BINAP                          | 622.67 | G | 98    | 100    | 599  | 5.99   | 3730   |
| RbCl                               | 120.92 | A | ≥99   | 10     | 71   | 7.13   | 862    |
| RbCl                               | 120.92 | D | 99    | 5      | 34   | 6.74   | 815    |
| RbCl                               | 120.92 | G | 99    | 10     | 58   | 5.80   | 701    |
| ReCl <sub>3</sub>                  | 292.57 | A |       | 5      | 1245 | 249.00 | 72850  |
| ReCl <sub>3</sub>                  | 292.57 | D |       | 1      | 407  | 407.00 | 119076 |
| ReCl <sub>5</sub>                  | 363.47 | A |       | 5      | 710  | 142.00 | 51613  |
| ReCl <sub>5</sub>                  | 363.47 | D | 99.9  | 10     | 1010 | 101.00 | 36710  |
| ReCl <sub>5</sub>                  | 363.47 | G | 99.9  | 5      | 462  | 92.40  | 33585  |
| ReCl <sub>5</sub>                  | 363.47 | Q | 99.9  | 10     | 1010 | 101.00 | 36710  |
| Rh <sub>2</sub> (Oac) <sub>4</sub> | 441.99 | A |       | 25     | 3710 | 148.40 | 65591  |
| Rh <sub>2</sub> (Oac) <sub>4</sub> | 441.99 | D | 98+   | 2      | 575  | 287.50 | 127072 |
| Rh <sub>2</sub> (Oac) <sub>4</sub> | 441.99 | E |       | 1      | 285  | 285.00 | 125967 |
| Rh <sub>2</sub> (Oac) <sub>4</sub> | 441.99 | F |       | 5      | 1154 | 230.73 | 101979 |
| Rh <sub>2</sub> (Oac) <sub>4</sub> | 441.99 | G | 99    | 25     | 3450 | 138.00 | 60996  |
| RhCl <sub>3</sub>                  | 209.26 | A | 98    | 2.5    | 606  | 242.40 | 50725  |
| RhCl <sub>3</sub>                  | 209.26 | D | 99.9  | 5      | 2388 | 477.60 | 99943  |
| RhCl <sub>3</sub>                  | 209.26 | G | 98    | 5      | 1056 | 211.20 | 44196  |
| RhCl <sub>3</sub>                  | 209.26 | Q | 99.9  | 2.5    | 470  | 187.80 | 39299  |
| RuCl <sub>3</sub>                  | 207.43 | A |       | 50     | 1510 | 30.20  | 6264   |
| RuCl <sub>3</sub>                  | 207.43 | D | 99.9  | 10     | 323  | 32.30  | 6700   |
| RuCl <sub>3</sub>                  | 207.43 | G |       | 25     | 704  | 28.16  | 5841   |
| RuCl <sub>3</sub>                  | 207.43 | Q | 99.9  | 50     | 1080 | 21.60  | 4481   |



|                                 |        |   |        |       |     |        |       |
|---------------------------------|--------|---|--------|-------|-----|--------|-------|
| S                               | 32.07  | A | 99.5   | 1000  | 134 | 0.13   | 4     |
| S                               | 32.07  | D | 99.5   | 2000  | 107 | 0.05   | 2     |
| S                               | 32.07  | G | 99     | 1000  | 69  | 0.07   | 2     |
| SbCl <sub>3</sub>               | 228.12 | A | 99     | 100   | 101 | 1.01   | 229   |
| SbCl <sub>3</sub>               | 228.12 | D | 99     | 2500  | 266 | 0.11   | 24    |
| SbCl <sub>3</sub>               | 228.12 | G | 99     | 1000  | 261 | 0.26   | 60    |
| SbCl <sub>5</sub>               | 299.03 | A | 99     | 1000  | 265 | 0.26   | 79    |
| SbCl <sub>5</sub>               | 299.03 | D | 99     | 1000  | 285 | 0.29   | 85    |
| SbCl <sub>5</sub>               | 299.03 | G | 99     | 500   | 157 | 0.31   | 94    |
| ScCl <sub>3</sub>               | 151.31 | A | 99.90  | 1     | 234 | 234.00 | 35407 |
| ScCl <sub>3</sub>               | 151.32 | D | 99.90  | 1     | 163 | 162.90 | 24650 |
| ScCl <sub>3</sub>               | 151.32 | G | 99.99  | 1     | 132 | 132.00 | 19974 |
| Se <sub>2</sub> Cl <sub>2</sub> | 228.83 | D | 99     | 50    | 507 | 10.14  | 2320  |
| Se <sub>2</sub> Cl <sub>2</sub> | 228.83 | G | 99     | 50    | 355 | 7.10   | 1625  |
| SeCl <sub>4</sub>               | 220.77 | A |        | 50    | 210 | 4.20   | 927   |
| SeCl <sub>4</sub>               | 220.77 | D | 99.4   | 100   | 320 | 3.20   | 706   |
| SeCl <sub>4</sub>               | 220.77 | G | 99.8   | 50    | 182 | 3.64   | 804   |
| SeO <sub>2</sub>                | 110.96 | A | 99.8   | 500   | 247 | 0.49   | 55    |
| SeO <sub>2</sub>                | 110.96 | D | 99.4   | 500   | 212 | 0.42   | 47    |
| SeO <sub>2</sub>                | 110.96 | G | 99.8   | 500   | 341 | 0.68   | 76    |
| SeOCl <sub>2</sub>              | 165.87 | A | 97     | 10    | 160 | 15.95  | 2646  |
| SeOCl <sub>2</sub>              | 165.87 | D | 99     | 60.75 | 619 | 10.19  | 1690  |
| SeOCl <sub>2</sub>              | 165.87 | G | 97     | 25    | 248 | 9.92   | 1645  |
| Si(OBu) <sub>4</sub>            | 320.54 | A | 97     | 100   | 112 | 1.12   | 359   |
| Si(OBu) <sub>4</sub>            | 320.54 | D | 97     | 100   | 100 | 1.00   | 321   |
| Si(OBu) <sub>4</sub>            | 320.54 | E | 97     | 449.5 | 245 | 0.55   | 175   |
| Si(OBu) <sub>4</sub>            | 320.54 | G | 97     | 50    | 69  | 1.38   | 442   |
| Si(OBu) <sub>4</sub>            | 320.54 | J | 95-98  | 500   | 160 | 0.32   | 103   |
| SiCl <sub>4</sub>               | 169.9  | A | 99     | 1000  | 93  | 0.09   | 16    |
| SiCl <sub>4</sub>               | 169.9  | D | 99     | 4449  | 259 | 0.06   | 10    |
| SiCl <sub>4</sub>               | 169.9  | E | 98     | 500   | 43  | 0.09   | 15    |
| SiCl <sub>4</sub>               | 169.9  | G | 99.999 | 500   | 250 | 0.50   | 85    |
| SiCl <sub>4</sub>               | 169.9  | H | 99     | 100   | 31  | 0.31   | 53    |
| SmCl <sub>3</sub>               | 256.72 | A | 99.9   | 10    | 235 | 23.50  | 6033  |
| SmCl <sub>3</sub>               | 256.72 | D | 99.9   | 50    | 349 | 6.98   | 1792  |
| SmCl <sub>3</sub>               | 256.72 | G | 99.9   | 100   | 532 | 5.32   | 1366  |
| SnCl <sub>2</sub>               | 182.69 | A | 98     | 2000  | 447 | 0.22   | 41    |
| SnCl <sub>2</sub>               | 182.69 | D | 98     | 2500  | 446 | 0.18   | 33    |
| SnCl <sub>2</sub>               | 182.69 | G | 98     | 500   | 103 | 0.21   | 38    |

|                      |        |   |        |        |        |       |       |
|----------------------|--------|---|--------|--------|--------|-------|-------|
| SnCl <sub>4</sub>    | 260.52 | A | 98     | 2000   | 341    | 0.17  | 44    |
| SnCl <sub>4</sub>    | 260.52 | D | 98     | 2000   | 160    | 0.08  | 21    |
| SnCl <sub>4</sub>    | 260.52 | G | 98     | 1000   | 138    | 0.14  | 36    |
| SnCl <sub>4</sub>    | 260.52 | H | 99     | 5000   | 189    | 0.04  | 10    |
| SnSO <sub>4</sub>    | 214.77 | A | 95     | 500    | 109    | 0.22  | 47    |
| SnSO <sub>4</sub>    | 214.77 | D | 95.5   | 1000   | 158    | 0.16  | 34    |
| SnSO <sub>4</sub>    | 214.77 | G | 95     | 500    | 56     | 0.11  | 24    |
| sodium acetate       | 82.03  | A | >99    | 25000  | 420    | 0.02  | 1     |
| sodium acetate       | 82.03  | H | >99    | 10000  | 130    | 0.01  | 1     |
| sodium formate       | 68.01  | A | >99    | 1000   | 91     | 0.09  | 6     |
| sodium formate       | 68.01  | H | 98     | 20000  | 296    | 0.01  | 1     |
| Sodium tert-butoxide | 96.1   | A | 97     | 1500   | 461    | 0.31  | 30    |
| Sodium tert-butoxide | 96.11  | D | 97     | 2500   | 594    | 0.24  | 23    |
| Sodium tert-butoxide | 96.11  | E |        | 500    | 139    | 0.28  | 27    |
| Sodium tert-butoxide | 96.11  | F | 98     | 2500   | 449    | 0.18  | 17    |
| Sodium tert-butoxide | 96.11  | G | 98     | 500    | 184    | 0.37  | 35    |
| Sodium tert-butoxide | 96.11  | H | 97     | 10000  | 755    | 0.08  | 7     |
| SrCl <sub>2</sub>    | 158.53 | A | ≥99.99 | 5      | 94     | 18.80 | 2980  |
| SrCl <sub>2</sub>    | 158.53 | D | 99.50  | 25     | 83     | 3.32  | 526   |
| SrCl <sub>2</sub>    | 158.53 | F | 99.99  | 5      | 85     | 16.92 | 2682  |
| TaCl <sub>5</sub>    | 358.21 | A | 99.8   | 100    | 493    | 4.93  | 1766  |
| TaCl <sub>5</sub>    | 358.21 | D | 99.8   | 100    | 303    | 3.03  | 1085  |
| TaCl <sub>5</sub>    | 358.21 | G | 99.9   | 50     | 143    | 2.86  | 1024  |
| TaCl <sub>5</sub>    | 358.21 | Q | 99.9   | 10     | 61     | 6.10  | 2185  |
| TbCl <sub>3</sub>    | 265.28 | A | 99.9   | 10     | 374    | 37.40 | 9921  |
| TbCl <sub>3</sub>    | 265.28 | D | 99.9   | 5      | 243    | 48.60 | 12893 |
| TbCl <sub>3</sub>    | 265.28 | G | 99.9   | 10     | 304    | 30.40 | 8065  |
| TBSOTf               | 264.34 | A | 98     | 25     | 254    | 10.16 | 2686  |
| TBSOTf               | 264.34 | H | 99     | 1000   | 410    | 0.41  | 108   |
| TBSOTf               | 264.34 | J | 99     | 50     | 232    | 4.64  | 1227  |
| TBSOTf               | 264.34 | M | 99     | 5000   | 1434   | 0.29  | 76    |
| tBuDavePhos          | 341.47 | A | 97     | 5      | 315.5  | 63.10 | 21547 |
| tBuDavePhos          | 341.47 | G | 98     | 10     | 570    | 57.00 | 19464 |
| tBuOOTBu             | 146.23 | A | 98     | 796    | 145    | 0.18  | 27    |
| TeCl <sub>4</sub>    | 269.41 | A | 99     | 100    | 542    | 5.42  | 1460  |
| TeCl <sub>4</sub>    | 269.41 | D | 99.9   | 100    | 258    | 2.58  | 695   |
| TeCl <sub>4</sub>    | 269.41 | G | 99.9   | 50     | 125    | 2.50  | 674   |
| tert-amyl alcohol    | 88.15  | F | 99     | 8100   | 332.36 | 0.04  | 4     |
| tetrahydrofuran      | 72.11  | A |        | 177800 | 3239   |       | 1     |
| tetrahydrofuran      | 72.11  | H | 99     | 177800 | 1495   | 0.01  | 1     |

|                                                       |        |   |        |        |      |       |       |
|-------------------------------------------------------|--------|---|--------|--------|------|-------|-------|
| Tf <sub>2</sub> O                                     | 282.14 | A | 99+    | 4000   | 3555 | 0.89  | 251   |
| Tf <sub>2</sub> O                                     | 282.14 | D | 98     | 250    | 471  | 1.88  | 532   |
| Tf <sub>2</sub> O                                     | 282.14 | H | 99.5   | 4000   | 1395 | 0.35  | 98    |
| Tf <sub>2</sub> O                                     | 282.14 | W | 99     | 1000   | 270  | 0.27  | 76    |
| TfCl                                                  | 168.52 | A | 99+    | 25     | 199  | 7.96  | 1341  |
| TfCl                                                  | 168.52 | D | 99     | 100    | 725  | 7.25  | 1222  |
| TfCl                                                  | 168.52 | M | 99     | 1000   | 3889 | 3.89  | 655   |
| TfOH                                                  | 150.08 | A | 98     | 100    | 151  | 1.51  | 226   |
| TfOH                                                  | 150.08 | D | 98+    | 250    | 301  | 1.20  | 181   |
| TfOH                                                  | 150.08 | H | 99.5   | 2500   | 395  | 0.16  | 24    |
| TiCl <sub>4</sub>                                     | 189.68 | A | 99.90  | 200    | 64   | 0.32  | 61    |
| TiCl <sub>4</sub>                                     | 189.71 | D | 99.99  | 100    | 172  | 1.72  | 326   |
| TiCl <sub>4</sub>                                     | 189.73 | G | 99     | 250    | 43   | 0.17  | 33    |
| TiCl <sub>4</sub>                                     | 189.71 | H | 99     | 100    | 44   | 0.44  | 83    |
| Ti(CF <sub>3</sub> COO) <sub>3</sub>                  | 543.43 | A |        | 50     | 267  | 5.33  | 2896  |
| Ti(CF <sub>3</sub> COO) <sub>3</sub>                  | 543.43 | D |        | 50     | 286  | 5.72  | 3108  |
| Ti(CF <sub>3</sub> COO) <sub>3</sub>                  | 543.43 | E | 95     | 10     | 101  | 10.10 | 5489  |
| Ti(CF <sub>3</sub> COO) <sub>3</sub>                  | 543.43 | G |        | 25     | 370  | 14.80 | 8043  |
| Ti(NO <sub>3</sub> ) <sub>3</sub> · 3H <sub>2</sub> O | 444.44 | A |        | 100    | 242  | 2.42  | 1076  |
| Ti(NO <sub>3</sub> ) <sub>3</sub> · 3H <sub>2</sub> O | 444.44 | D | 99.5   | 100    | 795  | 7.95  | 3533  |
| Ti <sub>2</sub> SO <sub>4</sub>                       | 504.83 | A | 99.9   | 250    | 559  | 2.24  | 1129  |
| Ti <sub>2</sub> SO <sub>4</sub>                       | 504.83 | D | 99.5   | 250    | 978  | 3.91  | 1975  |
| Ti <sub>2</sub> SO <sub>4</sub>                       | 504.83 | G | 99.5   | 100    | 290  | 2.90  | 1464  |
| TiCl                                                  | 239.84 | A | 99     | 25     | 101  | 4.02  | 964   |
| TiCl                                                  | 239.84 | D | 99.999 | 100    | 562  | 5.62  | 1348  |
| TiCl                                                  | 239.84 | H | 95     | 5      | 40   | 8.00  | 1919  |
| TmCl <sub>3</sub>                                     | 275.29 | A | 99.9   | 5      | 475  | 95.00 | 26153 |
| TmCl <sub>3</sub>                                     | 275.29 | F | 99.9   | 1      | 94   | 94.00 | 25877 |
| TmCl <sub>3</sub>                                     | 275.29 | G | 99.9   | 5      | 312  | 62.40 | 17178 |
| TMSBr                                                 | 153.1  | A | 97     | 100    | 141  | 1.41  | 216   |
| TMSBr                                                 | 153.1  | H | 95     | 1000   | 295  | 0.30  | 45    |
| TMSBr                                                 | 153.1  | J | 98     | 2500   | 700  | 0.28  | 43    |
| toluene                                               | 92.14  | A | >85    | 173000 | 3175 | 0.02  | 2     |
| toluene                                               | 92.14  | A |        | 173000 | 2441 |       | 1     |
| toluene                                               | 92.14  | D | 85     | 3468   | 77.6 | 0.02  | 2     |
| toluene                                               | 92.14  | F |        | 21625  | 421  |       | 2     |
| toluene                                               | 92.14  | H | 99.5   | 173000 | 700  | 0.00  | 0     |
| Tosyl chloride                                        | 190.65 | A | >98    | 3000   | 165  | 0.06  | 10    |
| Tosyl chloride                                        | 190.65 | D | 98     | 5000   | 230  | 0.05  | 9     |
| Tosyl chloride                                        | 190.64 | E |        | 500    | 36   | 0.07  | 14    |

|                                               |        |   |      |        |       |        |        |
|-----------------------------------------------|--------|---|------|--------|-------|--------|--------|
| Tosyl chloride                                | 190.64 | F | 99+  | 10000  | 397   | 0.04   | 8      |
| Tosyl chloride                                | 190.65 | H | 99   | 10000  | 395   | 0.04   | 8      |
| triethyl orthoformate                         | 148.2  | A | 98   | 1782   | 313   | 0.18   | 26     |
| triethyl orthoformate                         | 148.2  | D | 98   | 8910   | 373   | 0.04   | 6      |
| triethyl orthoformate                         | 148.2  | H | 99   | 3564   | 95    | 0.03   | 4      |
| triethylamine                                 | 101.19 | A | 99   | 726    | 100   | 0.14   | 14     |
| triethylamine                                 | 101.19 | D | 99   | 1815   | 92    | 0.05   | 5      |
| triethylamine                                 | 101.19 | H | 99.5 | 150000 | 1800  | 0.01   | 1      |
| trifluoroacetic acid                          | 114.02 | A | 99   | 2978   | 713   | 0.24   | 27     |
| trifluoroacetic acid                          | 114.02 | D | 99   | 2500   | 480   | 0.19   | 22     |
| trifluoroacetic acid                          | 114.02 | G | 99   | 500    | 170   | 0.34   | 39     |
| trifluoroacetic acid                          | 114.02 | H | 99   | 20000  | 560   | 0.03   | 3      |
| Tris(triphenylphosphine) rhodium(I) chloride  | 925.23 | A | 98   | 5      | 426.5 | 85.30  | 78922  |
| Tris(triphenylphosphine) rhodium(I) chloride  | 925.23 | D | 97   | 5      | 576   | 115.20 | 106586 |
| Tris(triphenylphosphine) rhodium(I) chloride  | 925.23 | E | >98  | 5      | 264   | 52.80  | 48852  |
| Tris(triphenylphosphine) rhodium(I) chloride) | 925.23 | G | 99   | 5      | 406   | 81.20  | 75129  |
| urea                                          | 60.06  | A |      | 5000   | 154   | 0.03   | 2      |
| urea                                          | 60.06  | E | 99   | 25000  | 185   | 0.00   | 0      |
| V <sub>2</sub> O <sub>3</sub>                 | 149.88 | A | 98   | 100    | 284   | 2.84   | 426    |
| V <sub>2</sub> O <sub>3</sub>                 | 149.88 | D | 95   | 5000   | 638   | 0.13   | 19     |
| V <sub>2</sub> O <sub>3</sub>                 | 149.88 | G | 95   | 250    | 99    | 0.40   | 59     |
| V <sub>2</sub> O <sub>3</sub>                 | 149.88 | G | 98   | 100    | 284   | 2.84   | 426    |
| V <sub>2</sub> O <sub>3</sub>                 | 149.88 | Q | 95   | 5000   | 644   | 0.13   | 19     |
| V <sub>2</sub> O <sub>4</sub>                 | 165.88 | A | >99  | 20     | 207   | 10.33  | 1713   |
| V <sub>2</sub> O <sub>4</sub>                 | 165.88 | D | 99   | 50     | 248   | 4.96   | 823    |
| V <sub>2</sub> O <sub>4</sub>                 | 165.88 | G | >99  | 50     | 241   | 4.82   | 800    |
| V <sub>2</sub> O <sub>5</sub>                 | 181.88 | A | >98  | 500    | 146   | 0.29   | 53     |
| V <sub>2</sub> O <sub>5</sub>                 | 181.88 | D | 99.2 | 1000   | 144   | 0.14   | 26     |
| V <sub>2</sub> O <sub>5</sub>                 | 181.88 | G | 98   | 500    | 77    | 0.15   | 28     |
| V <sub>2</sub> O <sub>5</sub>                 | 181.88 | Q | 98   | 2500   | 316   | 0.13   | 23     |
| VCl <sub>2</sub>                              | 121.85 | A | 85   | 5      | 270   | 53.90  | 6568   |
| VCl <sub>3</sub>                              | 157.3  | A | 97   | 100    | 276   | 2.76   | 433    |
| VCl <sub>3</sub>                              | 157.3  | D | 99   | 50     | 341   | 6.82   | 1073   |
| VCl <sub>3</sub>                              | 157.3  | G | 95   | 50     | 172   | 3.44   | 541    |
| VCl <sub>3</sub>                              | 157.3  | Q | 97   | 100    | 156   | 1.56   | 246    |
| WCl <sub>4</sub>                              | 325.65 | A | 95   | 25     | 388   | 15.50  | 5048   |
| WCl <sub>4</sub>                              | 325.65 | G | 97   | 25     | 345   | 13.80  | 4494   |
| WCl <sub>4</sub>                              | 325.65 | Q | 97   | 5      | 124   | 24.70  | 8044   |

|                      |        |   |       |      |      |        |        |
|----------------------|--------|---|-------|------|------|--------|--------|
| WCl <sub>6</sub>     | 396.56 | A | >99.9 | 100  | 240  | 2.40   | 950    |
| WCl <sub>6</sub>     | 396.56 | D | 99    | 250  | 626  | 2.50   | 993    |
| WCl <sub>6</sub>     | 396.56 | G | >99.9 | 100  | 188  | 1.88   | 746    |
| WCl <sub>6</sub>     | 396.56 | Q | 99    | 250  | 386  | 1.54   | 612    |
| Wilkinson's catalyst | 925.23 | A | 98    | 5    | 427  | 85.30  | 78922  |
| Wilkinson's catalyst | 925.23 | D | 98    | 5    | 576  | 115.20 | 106586 |
| Wilkinson's catalyst | 925.23 | E | 98    | 5    | 264  | 52.80  | 48852  |
| Wilkinson's catalyst | 925.23 | F | 98    | 5    | 354  | 70.80  | 65506  |
| Wilkinson's catalyst | 925.23 | G | 98    | 5    | 406  | 81.20  | 75129  |
| Xantphos             | 578.62 | A | 97    | 25   | 718  | 28.72  | 16618  |
| Xantphos             | 578.62 | D | 97    | 5    | 228  | 45.60  | 26385  |
| Xantphos             | 578.62 | G | 98    | 100  | 1764 | 17.64  | 10207  |
| Xantphos             | 578.62 | H | 97    | 500  | 850  | 1.70   | 984    |
| YbCl <sub>3</sub>    | 279.4  | A | 99.9  | 5    | 196  | 39.20  | 10952  |
| YbCl <sub>3</sub>    | 279.4  | D | 99.99 | 25   | 406  | 16.24  | 4537   |
| YbCl <sub>3</sub>    | 279.4  | G | 99.9  | 25   | 342  | 13.68  | 3822   |
| YCl <sub>3</sub>     | 195.26 | A | 99.99 | 50   | 260  | 5.19   | 1013   |
| YCl <sub>3</sub>     | 195.26 | D | 99.99 | 50   | 228  | 4.56   | 890    |
| YCl <sub>3</sub>     | 195.26 | G | 99.90 | 50   | 180  | 3.60   | 703    |
| Zinc dust            | 65.39  | A |       | 1000 | 90   | 0.09   | 6      |
| Zinc dust            | 65.39  | D | 99.9  | 5000 | 224  | 0.04   | 3      |
| Zinc dust            | 65.39  | H | 98    | 2500 | 159  | 0.06   | 4      |
| ZnCl <sub>2</sub>    | 136.3  | A | >98   | 5000 | 470  | 0.09   | 13     |
| ZnCl <sub>2</sub>    | 136.3  | D | 97    | 5000 | 458  | 0.09   | 12     |
| ZnCl <sub>2</sub>    | 136.3  | E | 98    | 300  | 31   | 0.10   | 14     |
| ZnCl <sub>2</sub>    | 136.3  | G | 97    | 500  | 79   | 0.16   | 22     |
| ZnCl <sub>2</sub>    | 136.3  | H | 98    | 4000 | 159  | 0.04   | 5      |
| ZnO                  | 81.39  | A | 99    | 1000 | 107  | 0.11   | 9      |
| ZnO                  | 82.39  | D | 98    | 5000 | 188  | 0.04   | 3      |
| ZnO                  | 83.39  | G | 99.7  | 2000 | 88   | 0.04   | 4      |
| ZrCl <sub>4</sub>    | 233.04 | A | ≥99.5 | 100  | 69   | 0.69   | 160    |
| ZrCl <sub>4</sub>    | 233.03 | D | ≥99.5 | 100  | 37   | 0.37   | 86     |
| ZrCl <sub>4</sub>    | 233.03 | G | 99.50 | 50   | 22   | 0.44   | 103    |
